# Supplementary material for: Characterization of the degradation products of bambuterol using LCMS-QTOF and NMR
Source: Royal Society of Chemistry journal article supplement (doi:10.1039/c5ay00569h), 2015-01-01
Supplement: c5ay00569h1.pdf [file c5ay00569h1.pdf]

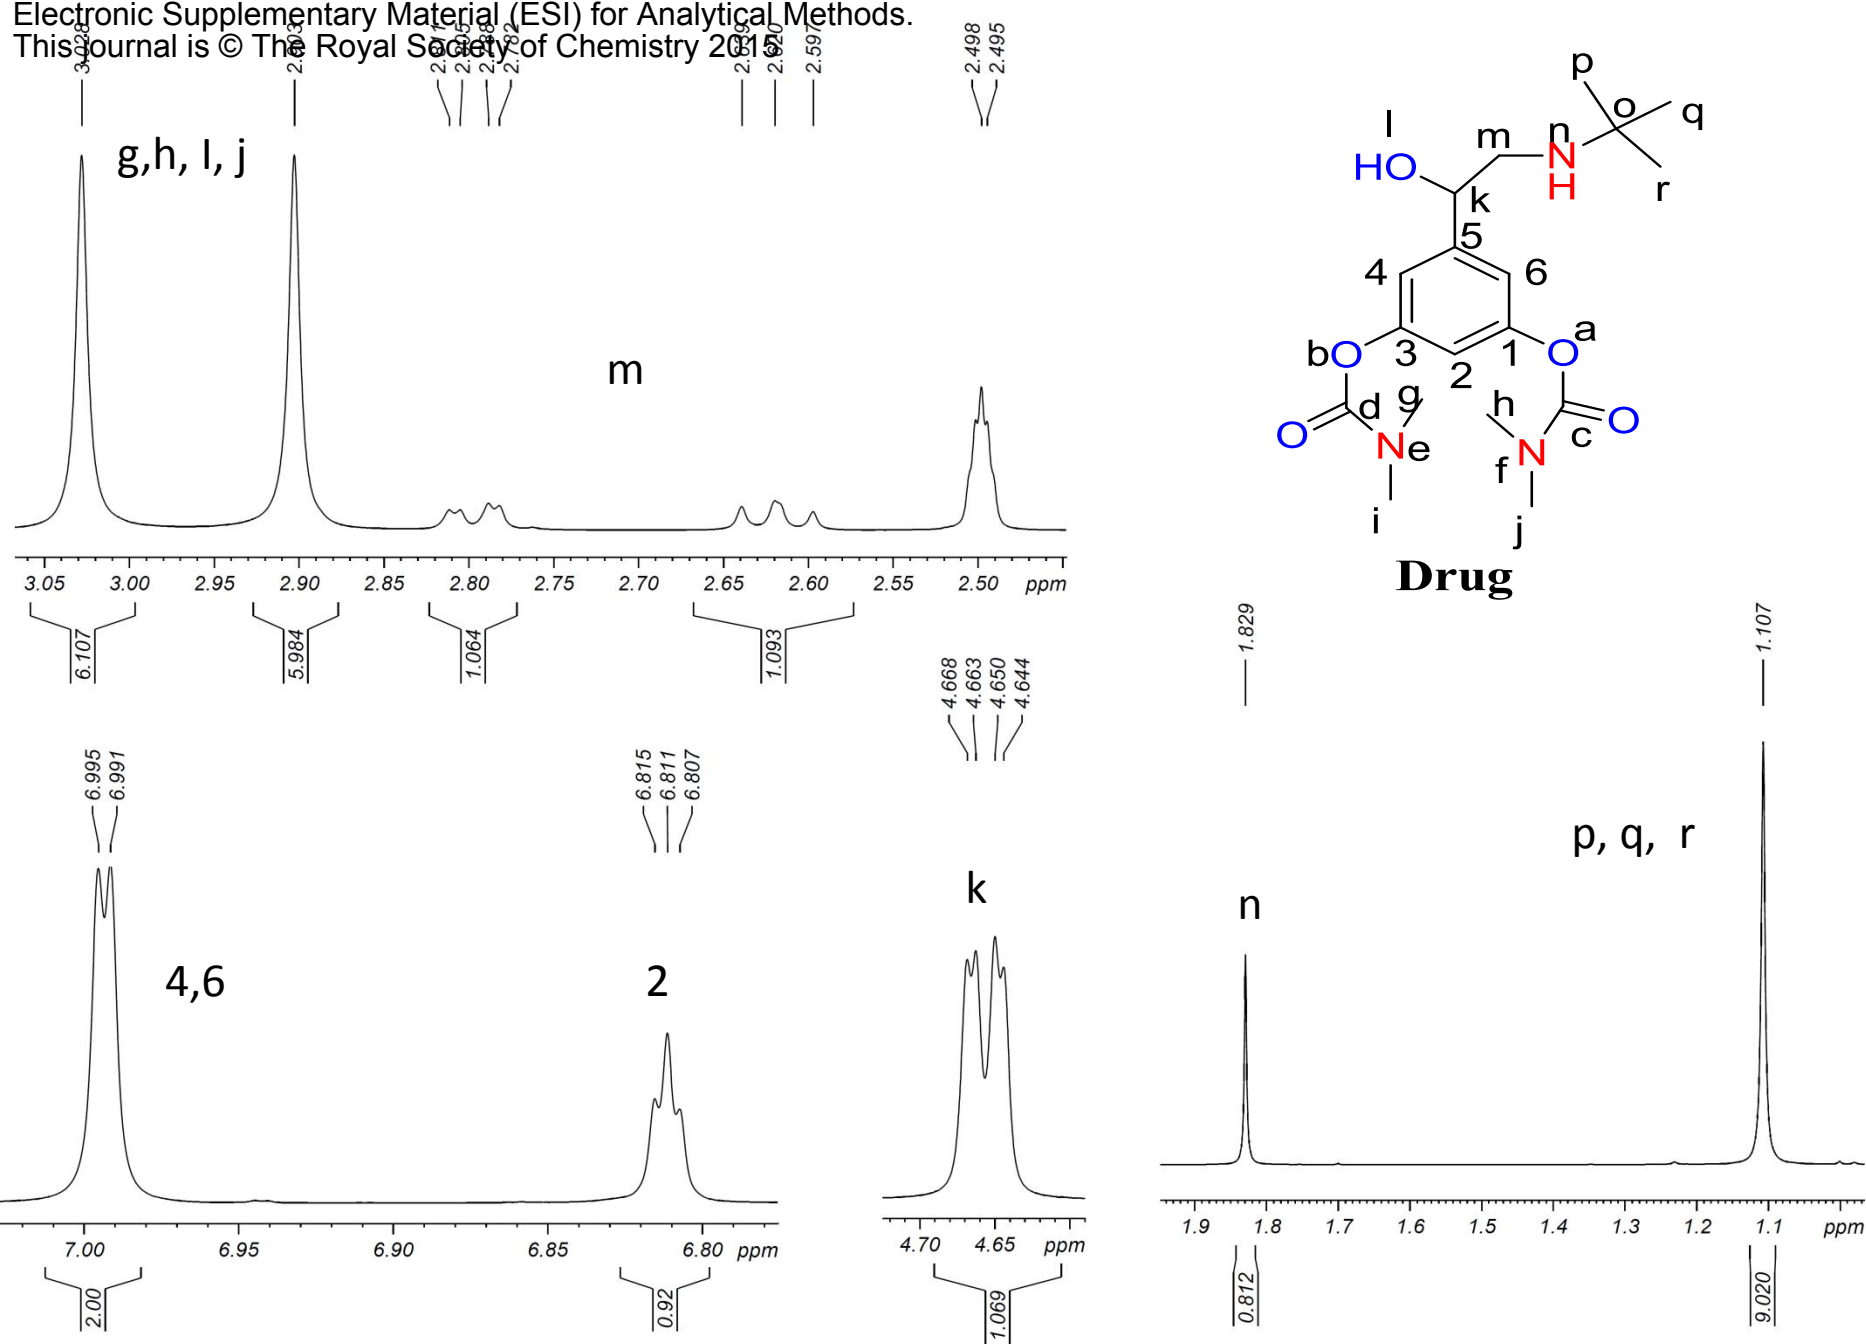

**Sfigure 1: Expanded  $^1\text{H}$  NMR spectra of Bambuterol**

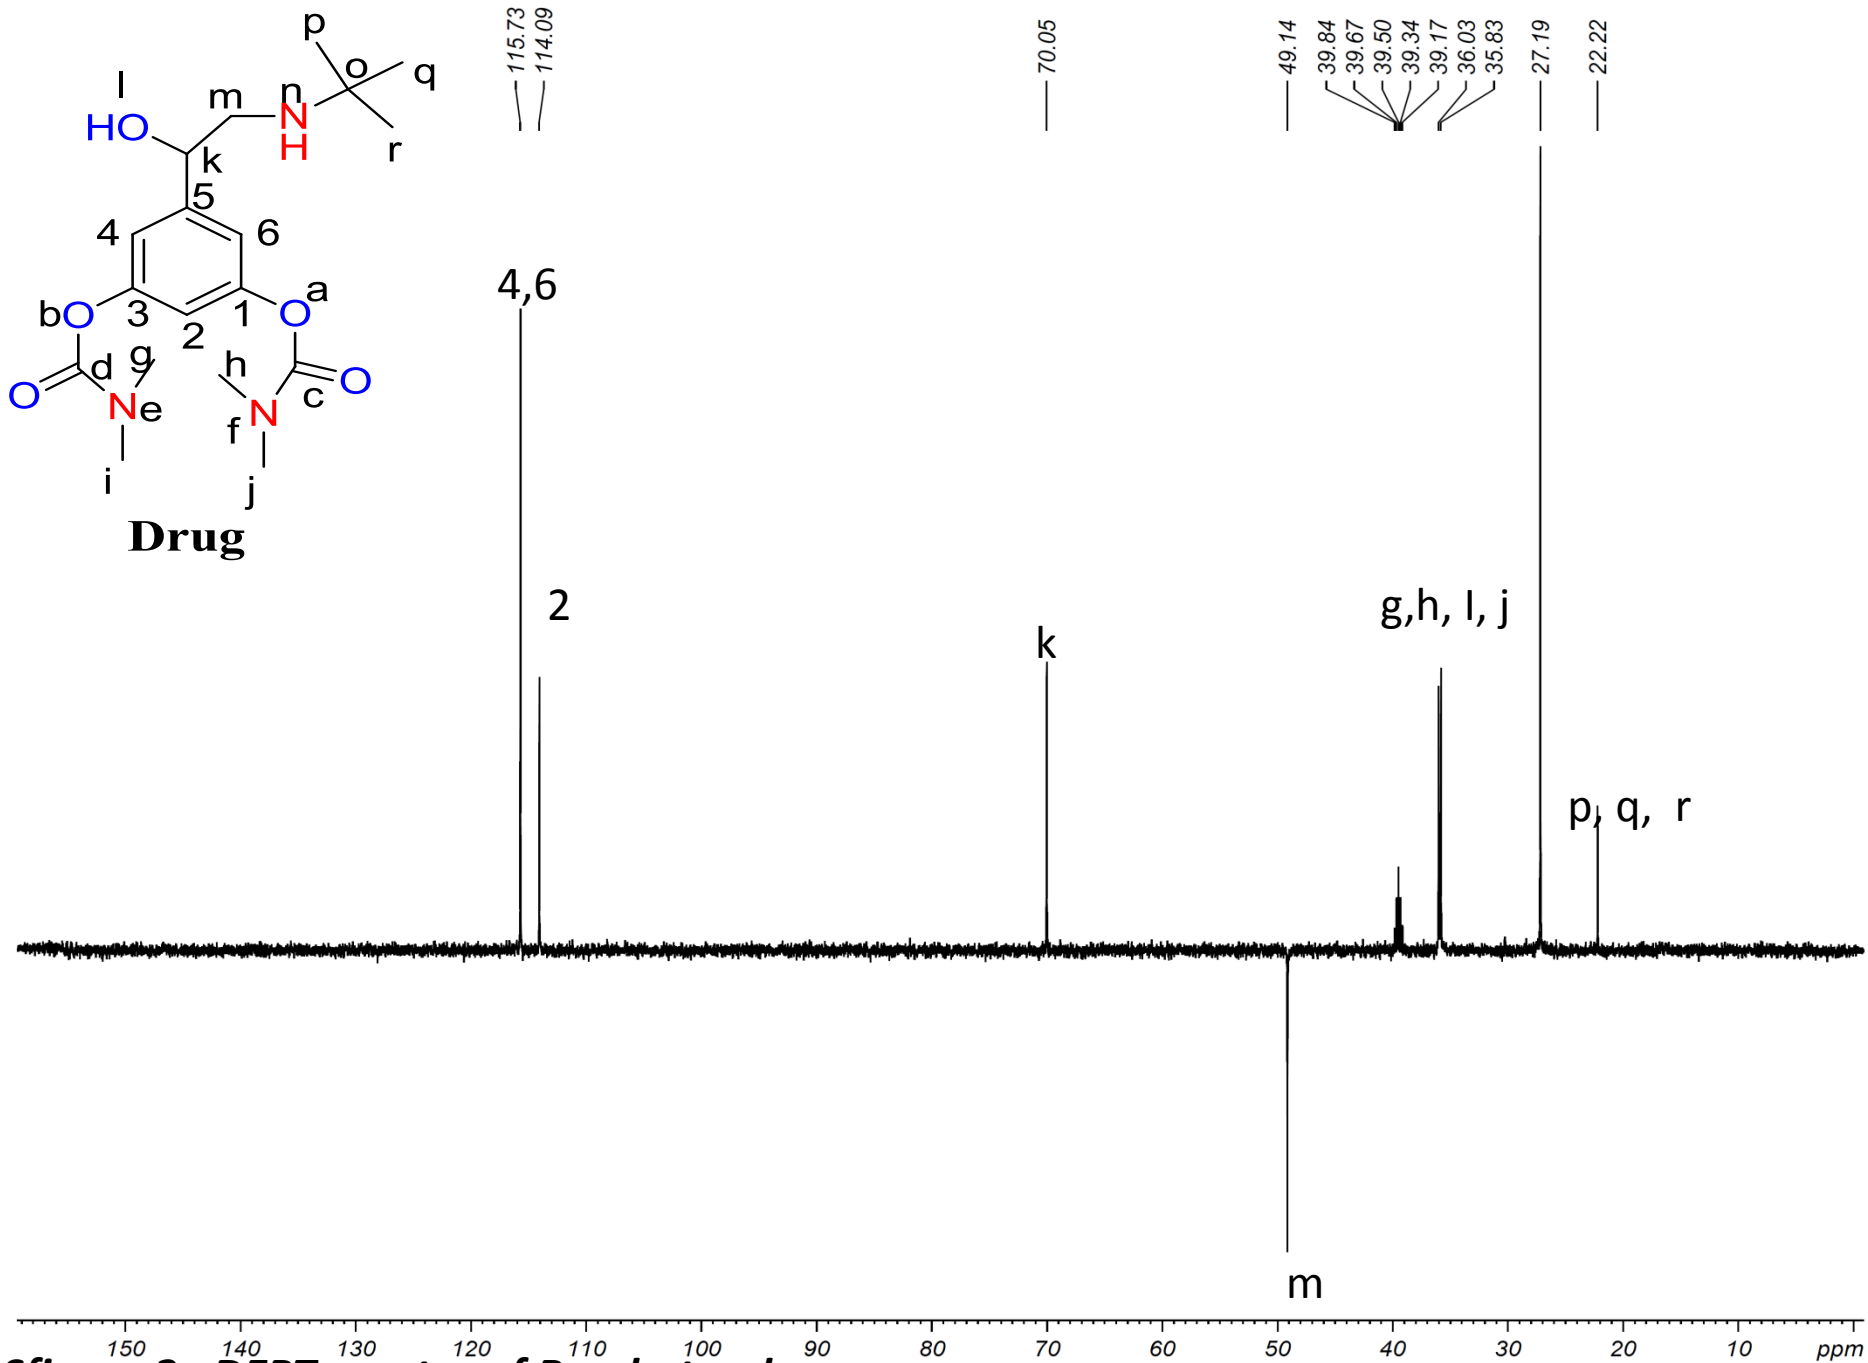

**Figure 2: DEPT spectra of Bambuterol**

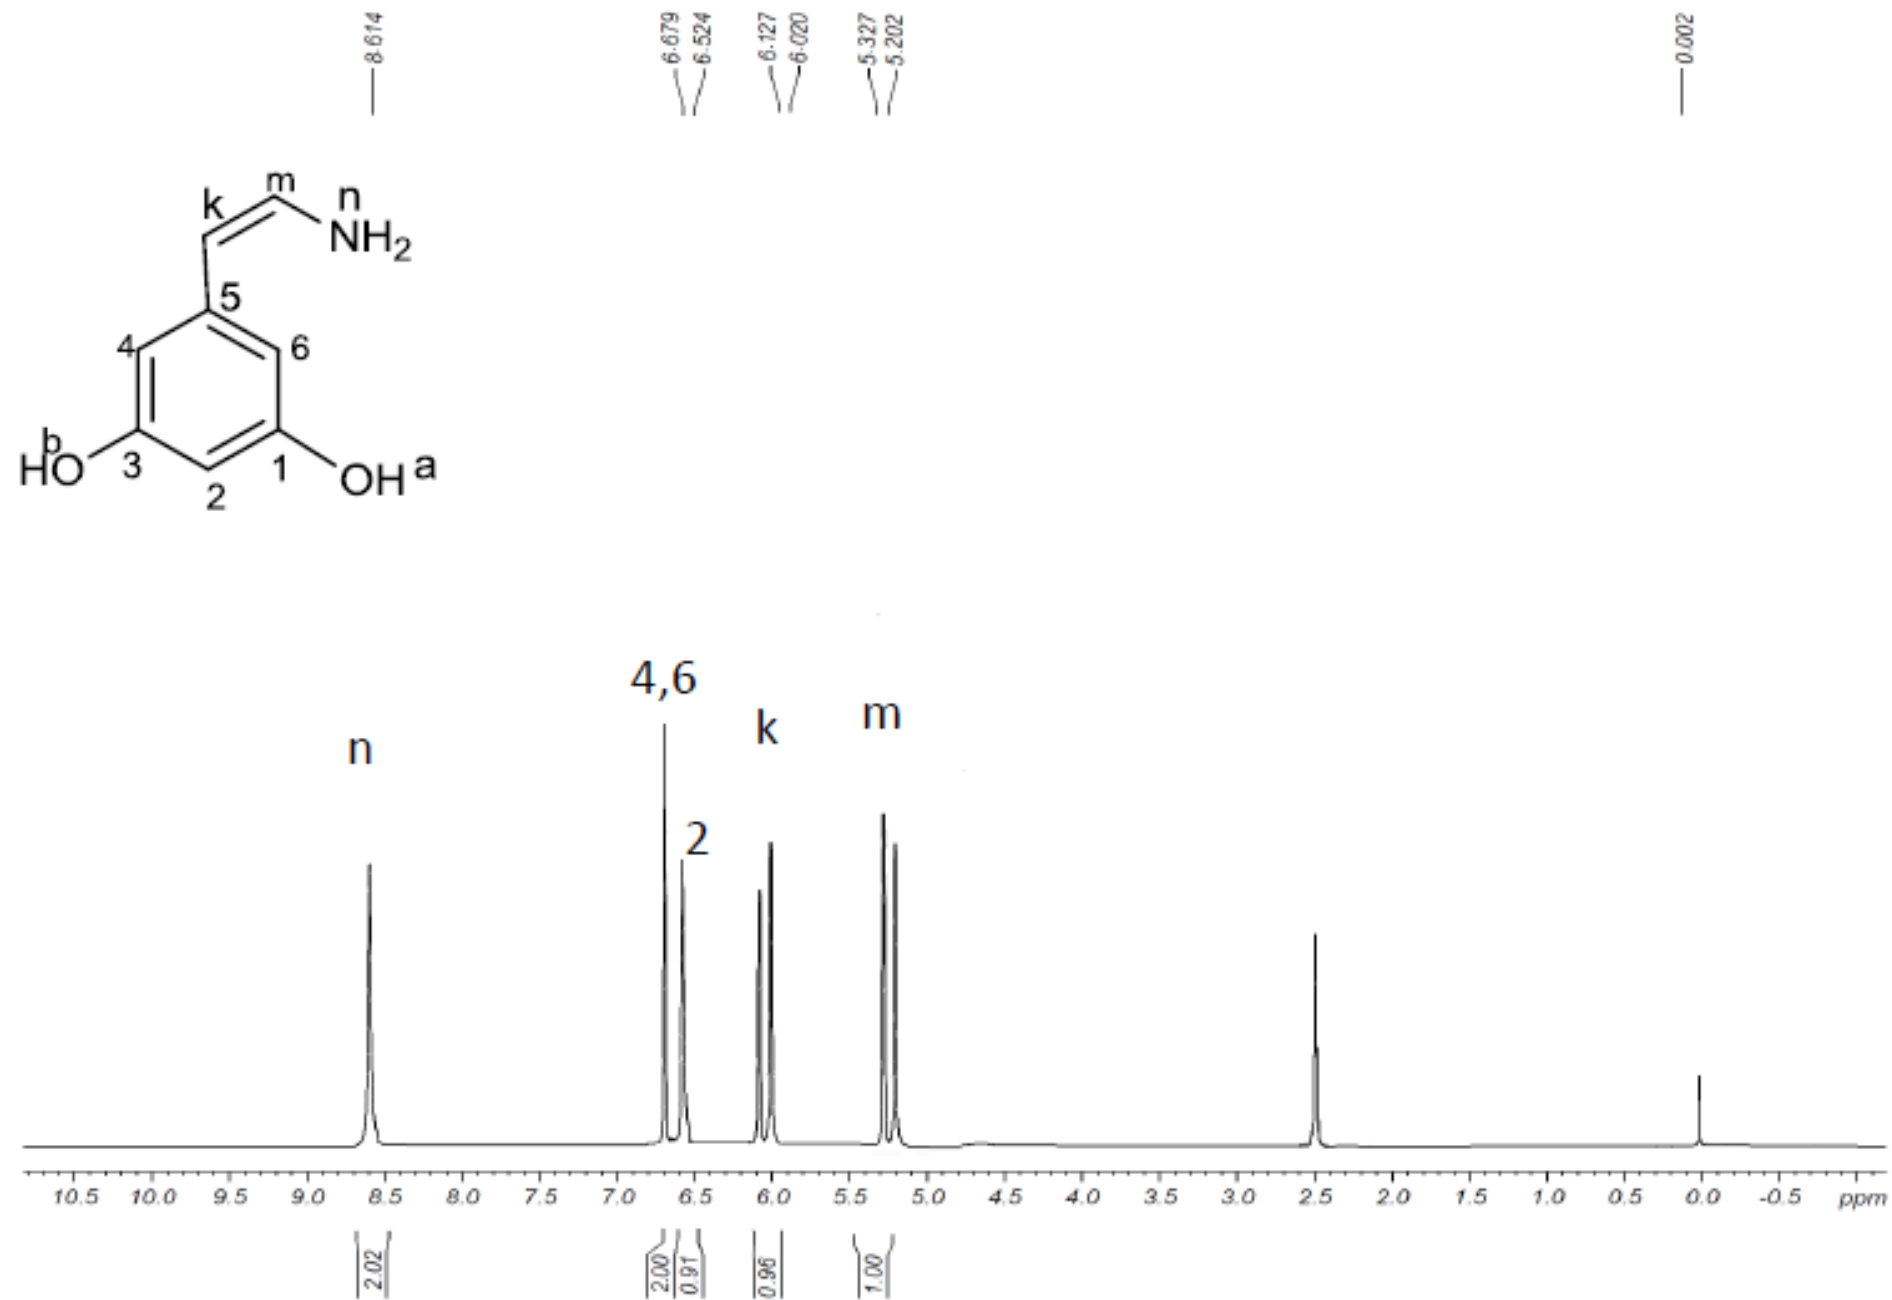

**Figure 3:  $^1\text{H}$  NMR spectra of DP-1**

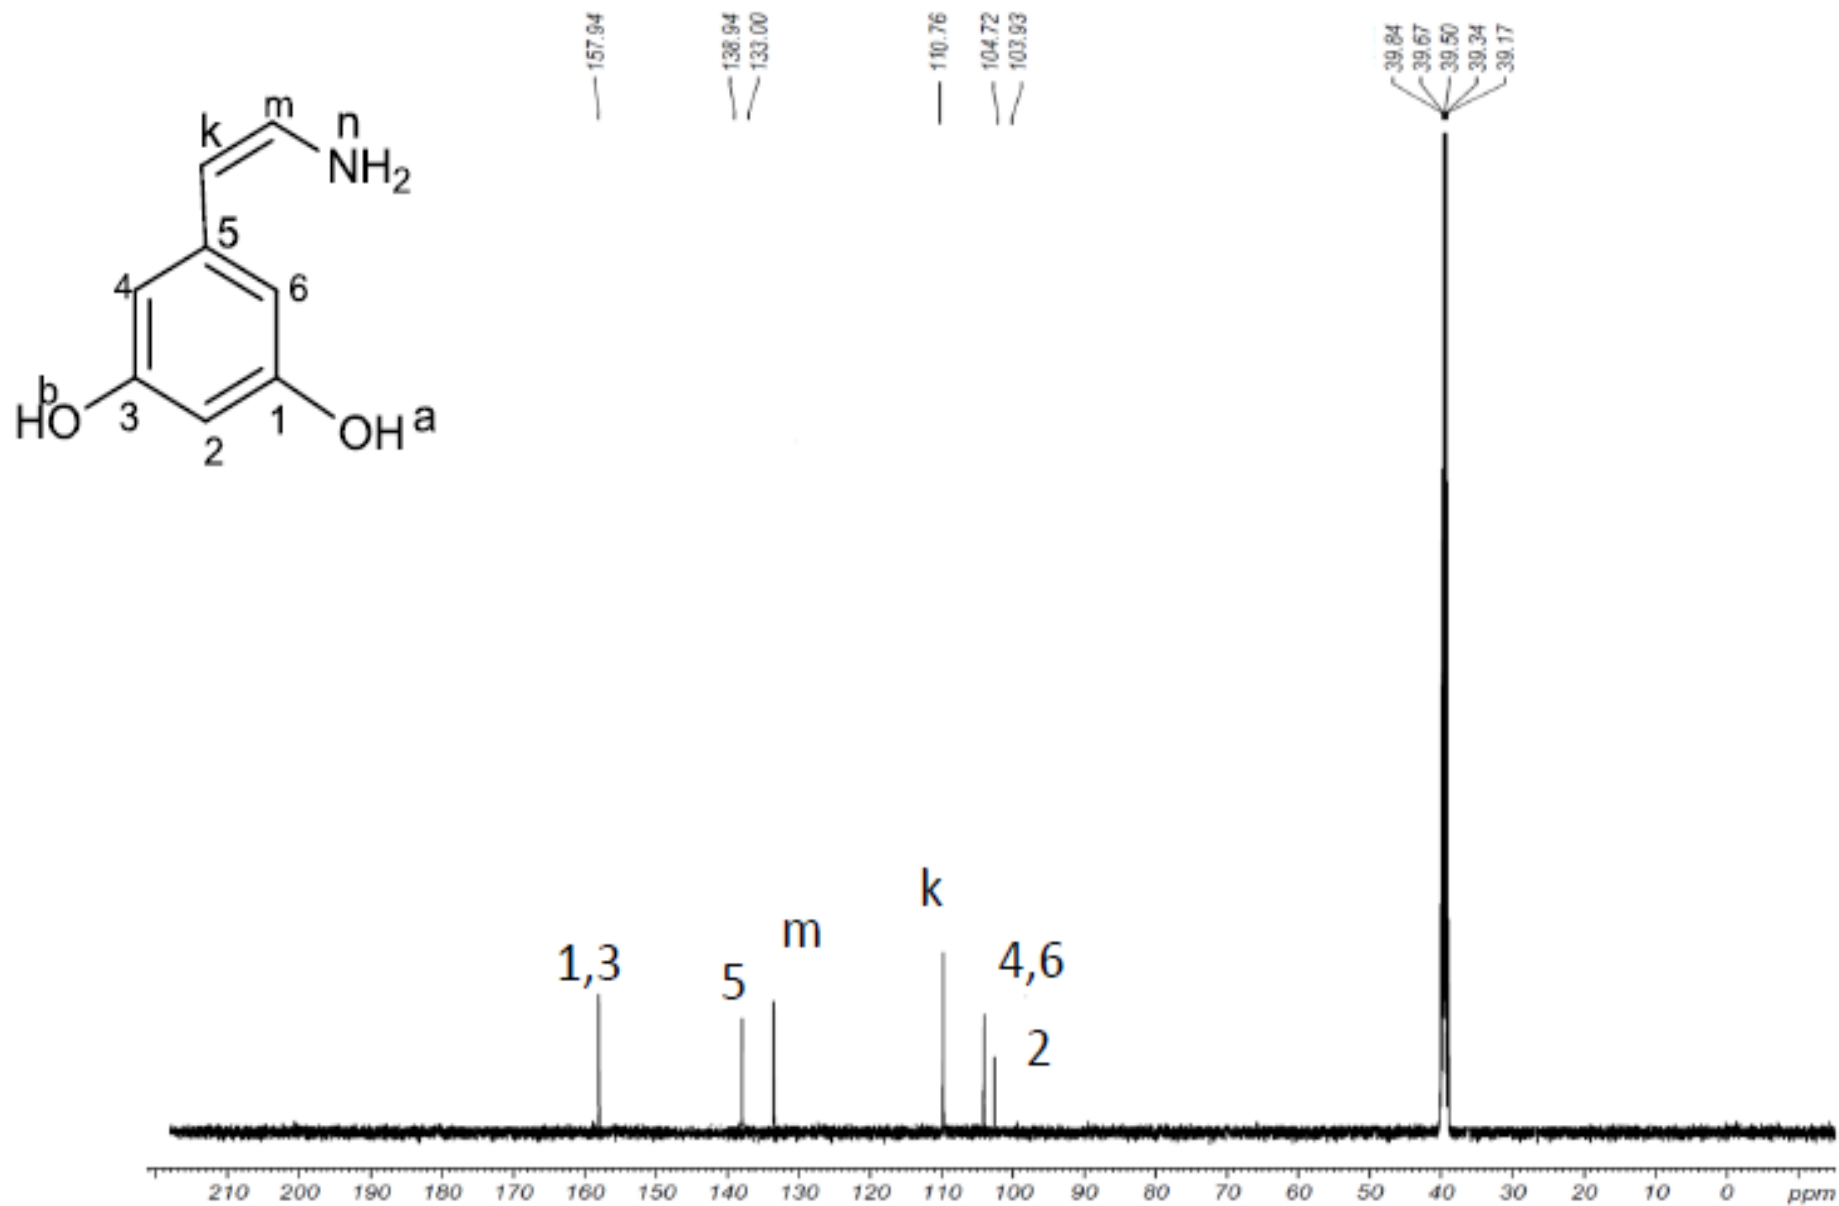

**Figure 4:**  $^{13}\text{C}$  and DEPT NMR spectra of DP-1

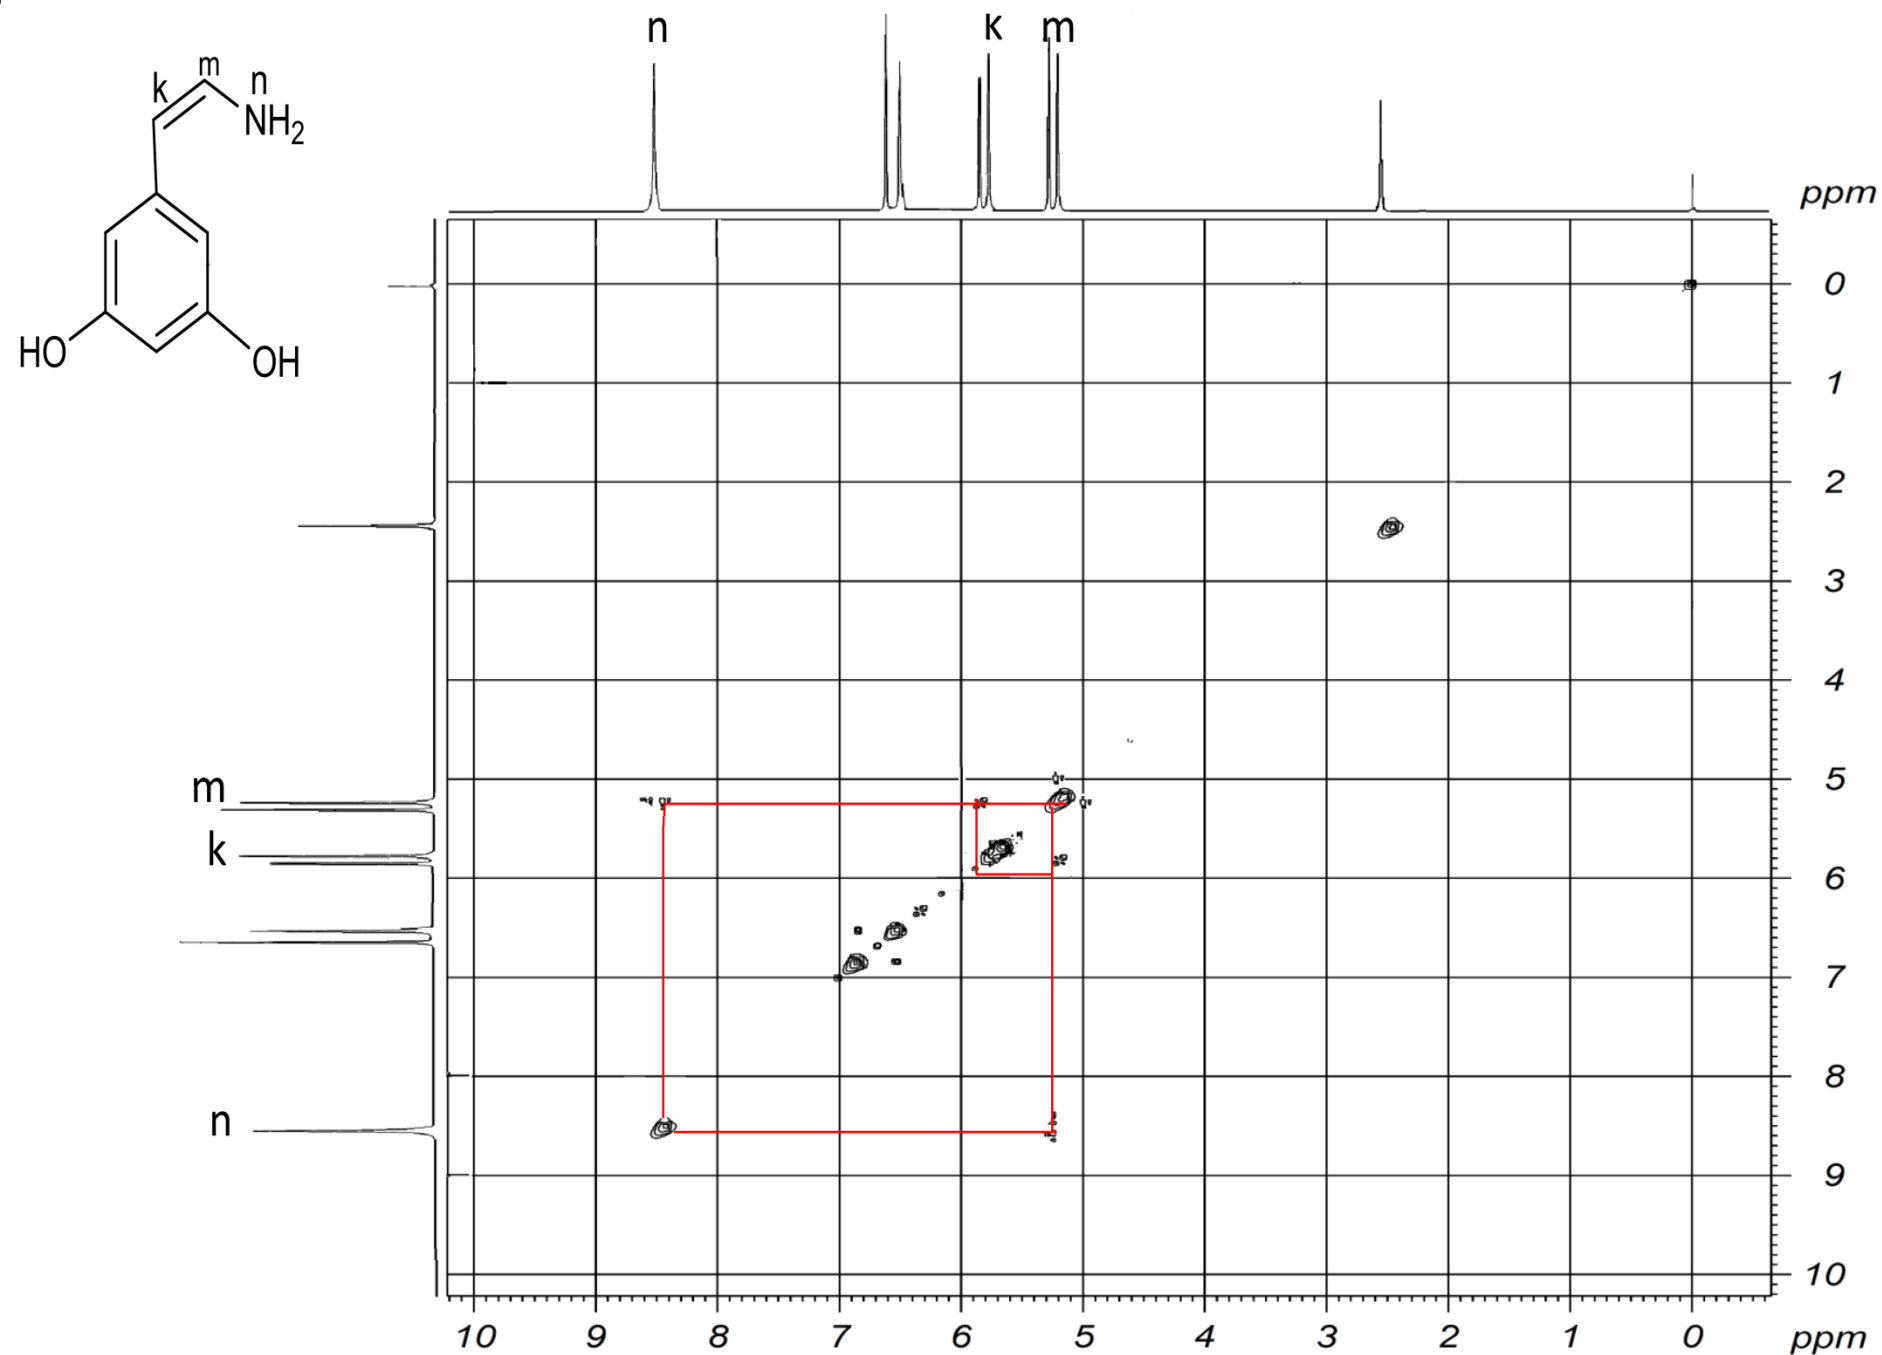

**Figure 5: COSY NMR spectra of DP-1**

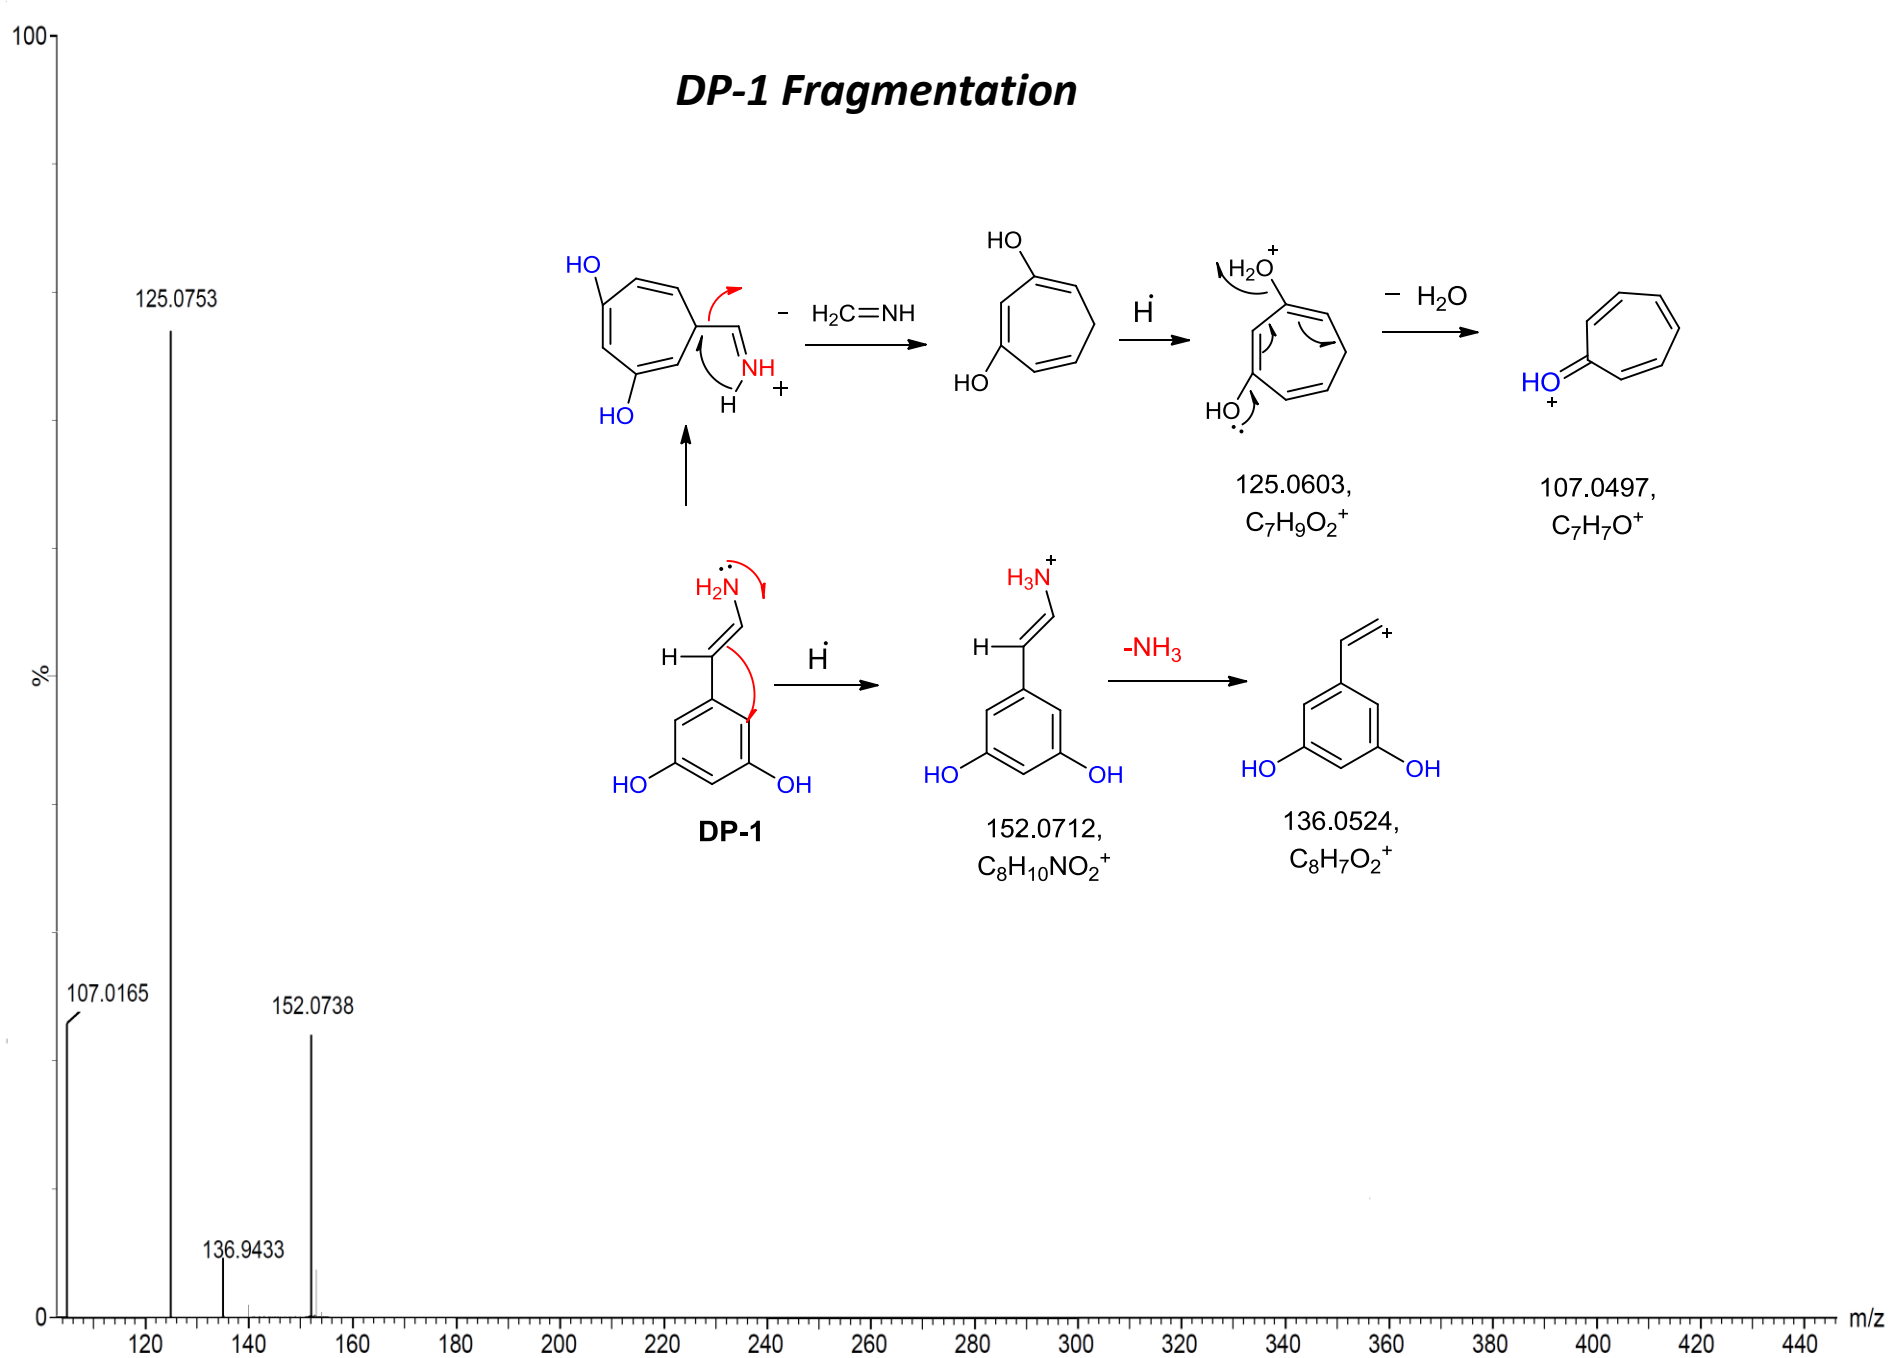

**Figure 6: Fragmentation pattern and LCMS spectra of DP-1**

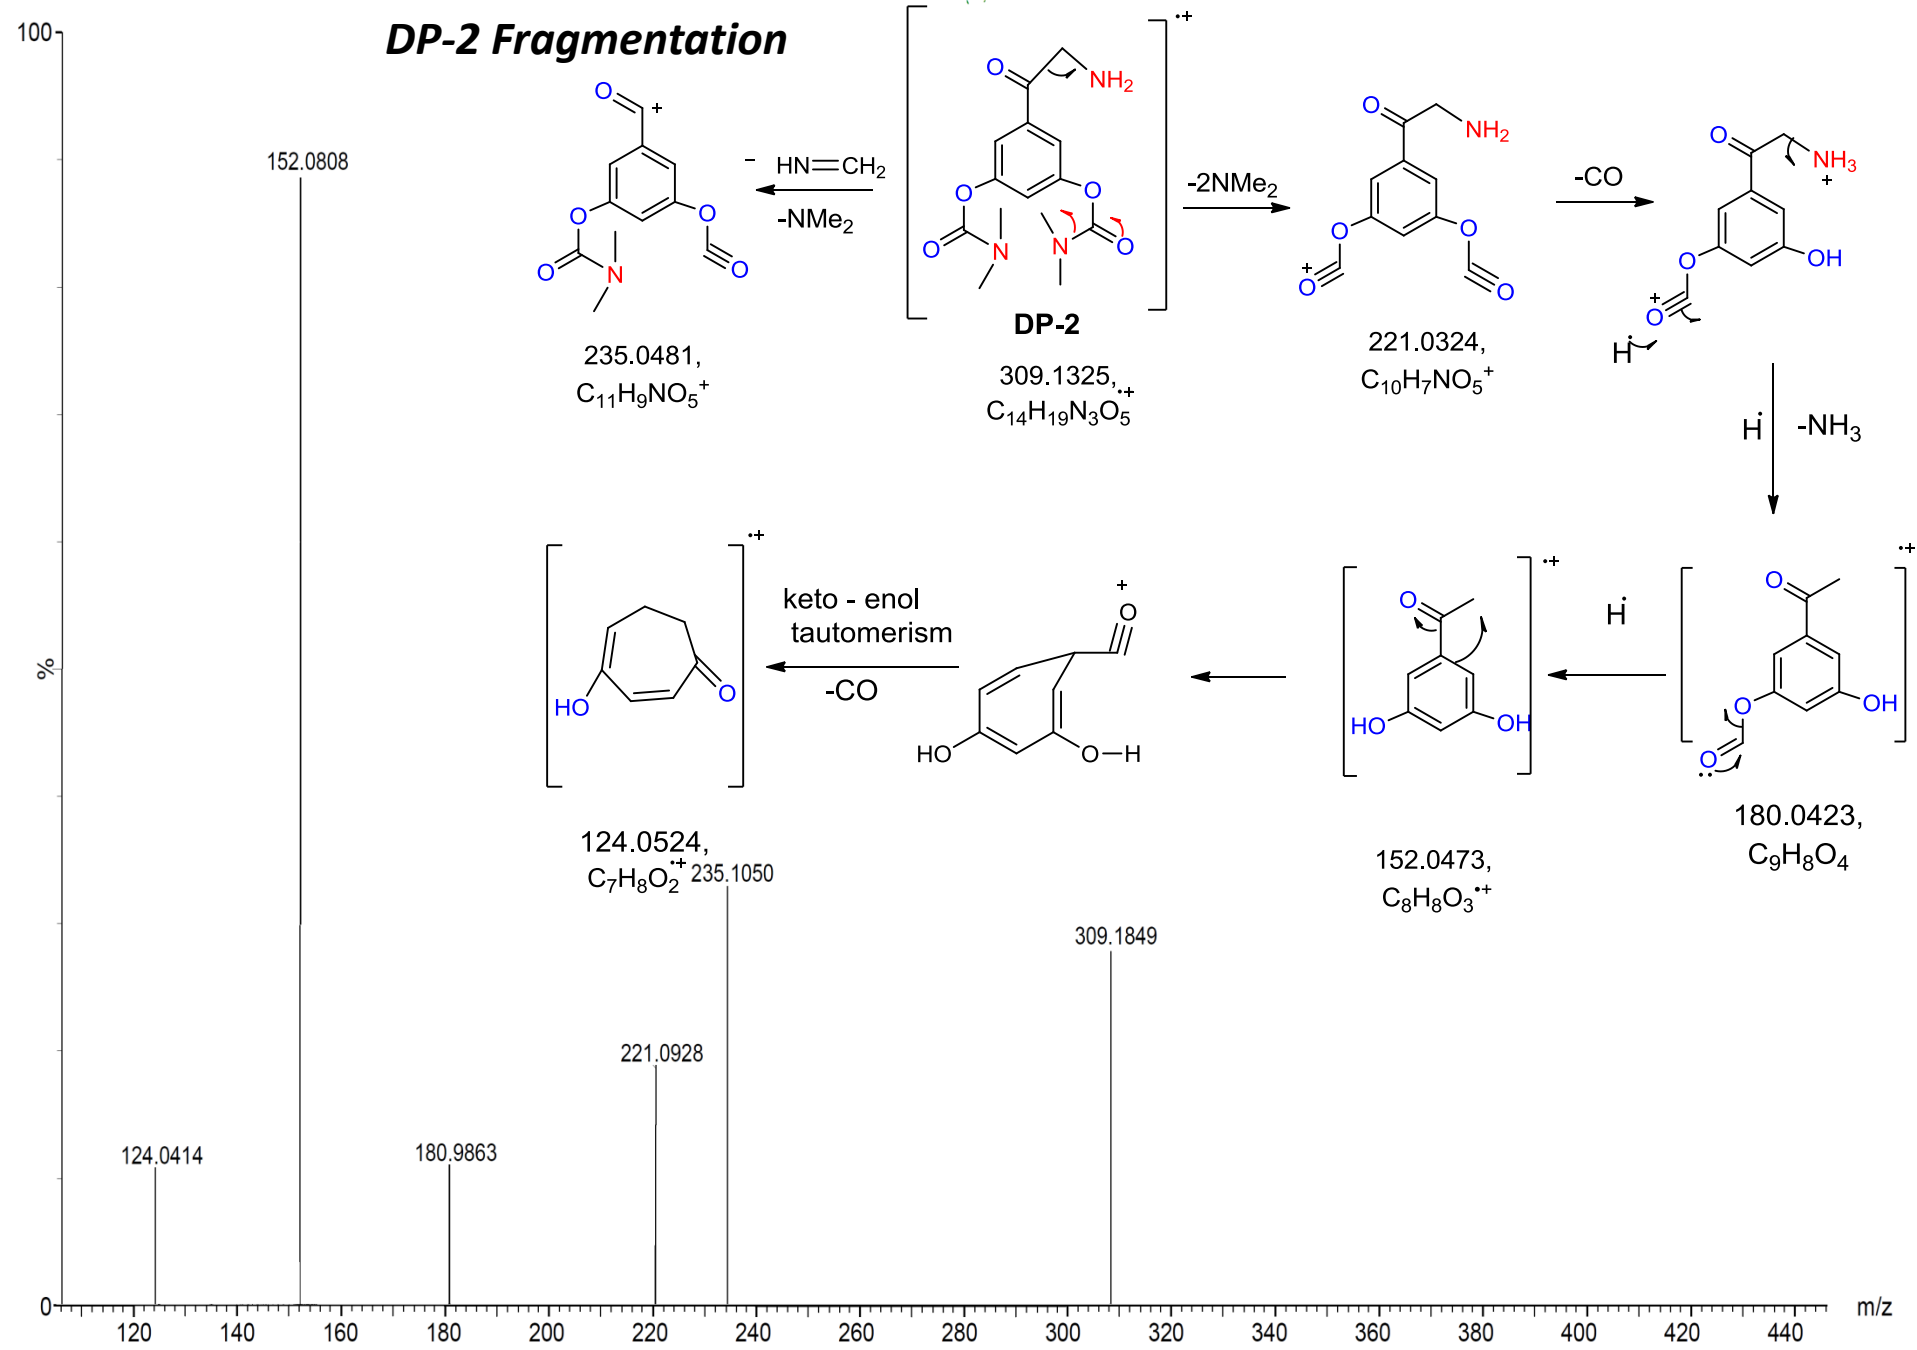

**Figure 7: Fragmentation pattern and LCMS spectra of DP-2**

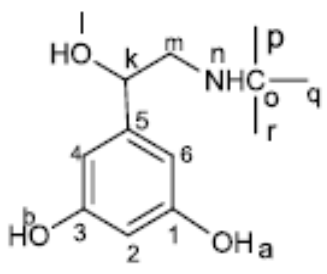

7.012  
6.846  
4.763  
4.723  
2.879  
2.750  
2.503  
1.822  
1.363  
-0.002

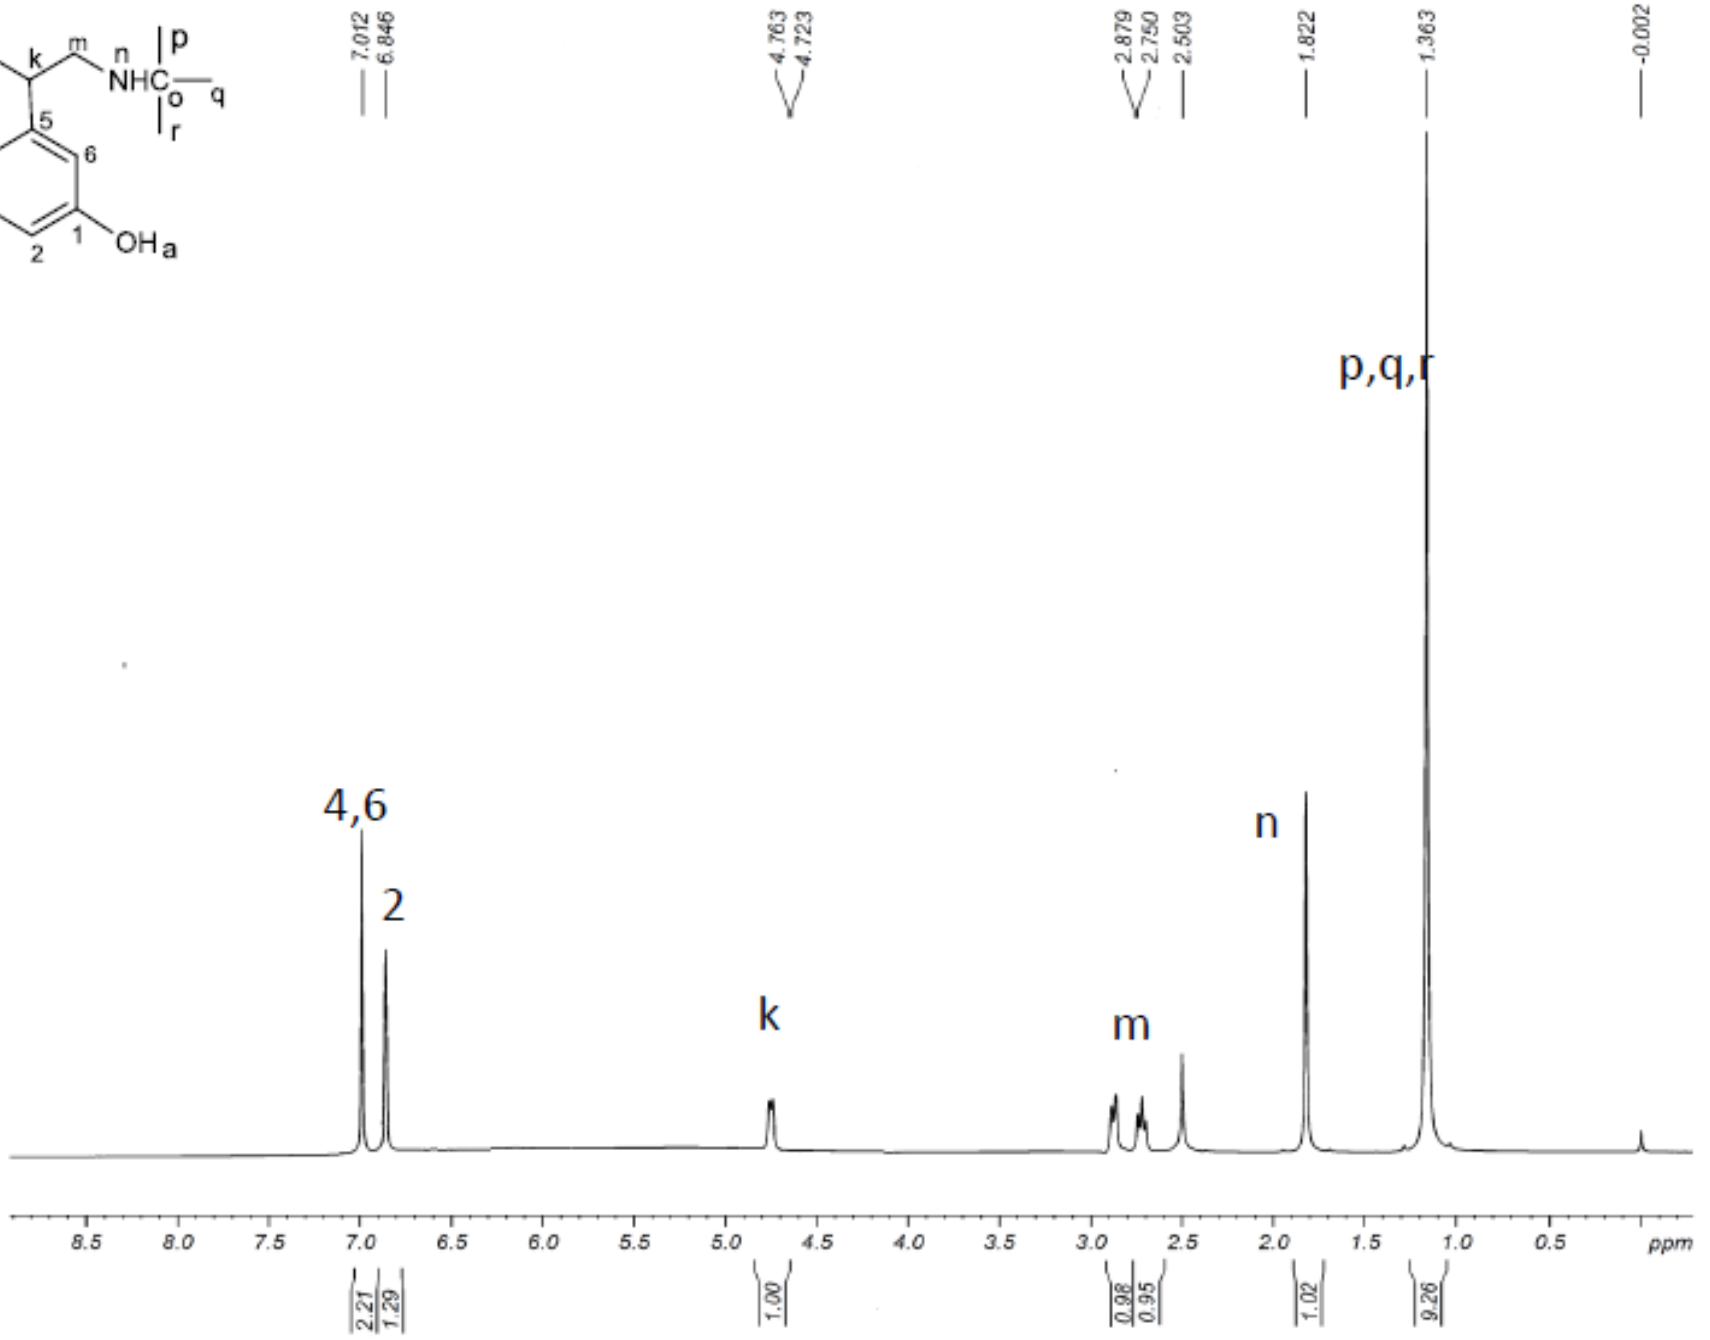

**Sfigure 8: <sup>1</sup>H NMR spectra of DP-3**



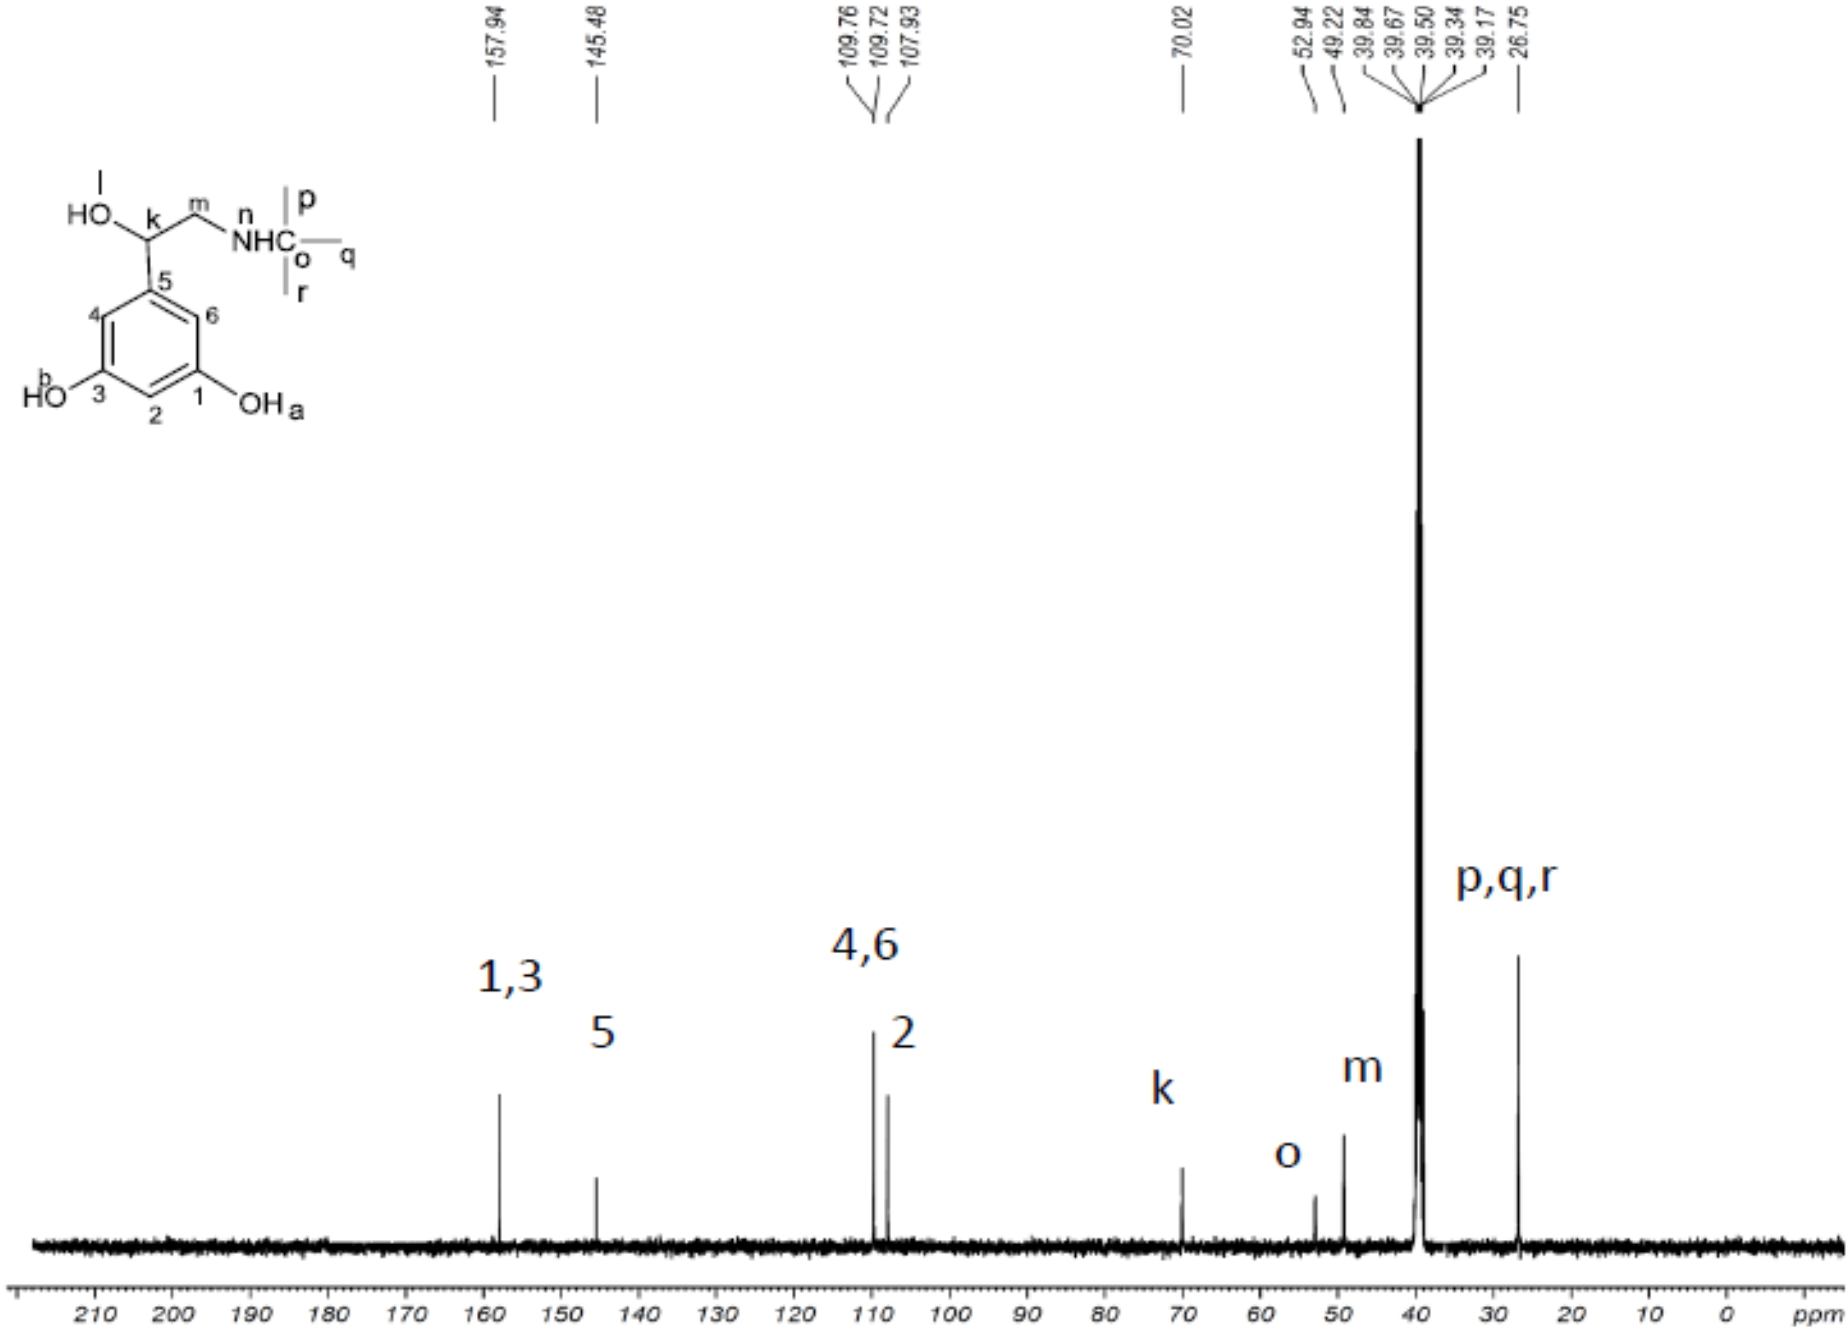

**Figure 9:**  $^{13}\text{C}$  NMR spectra of DP-3

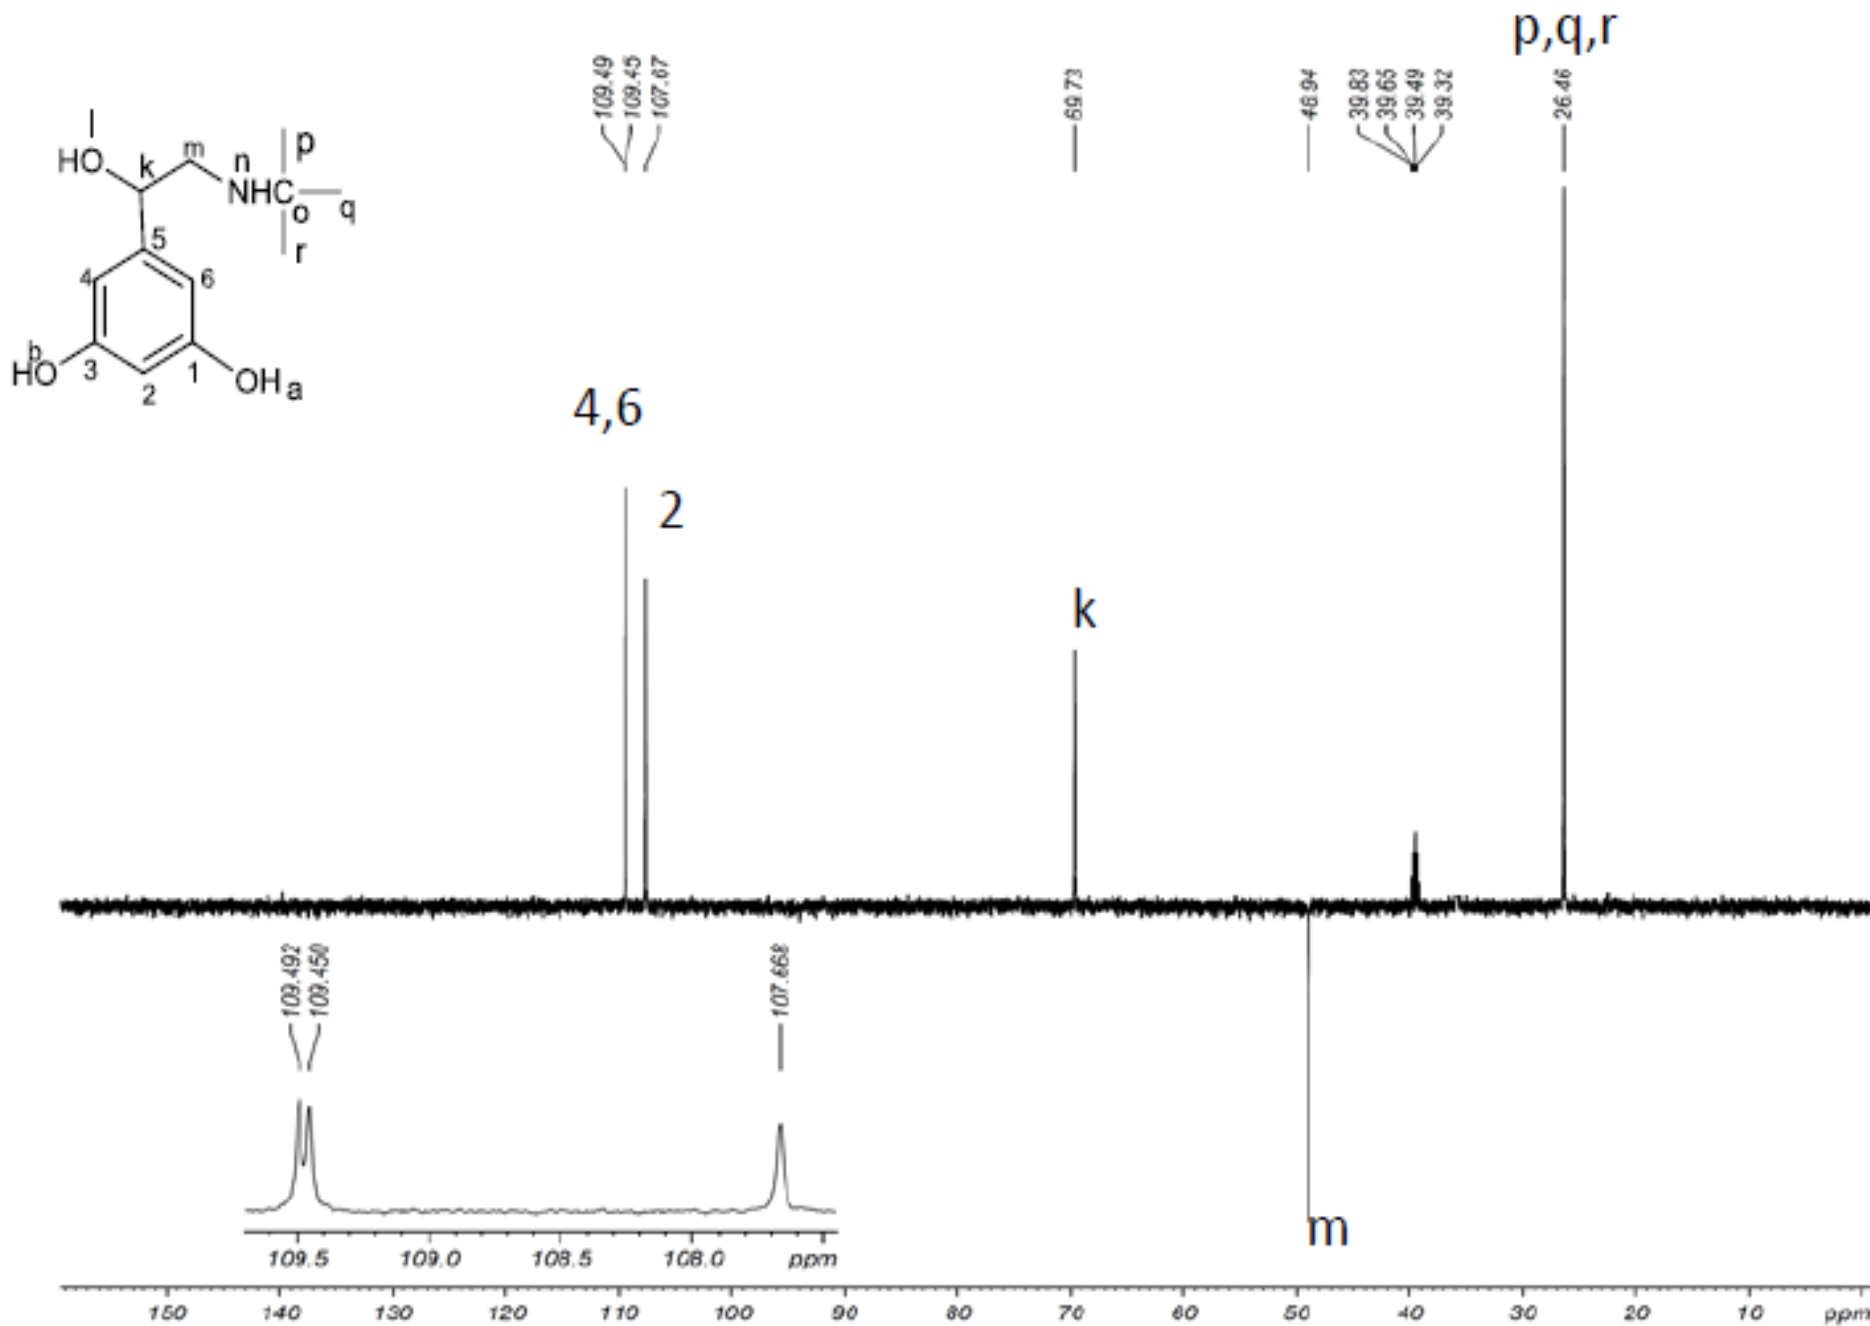

**Figure 10: DEPT-135 NMR spectra of DP-3**

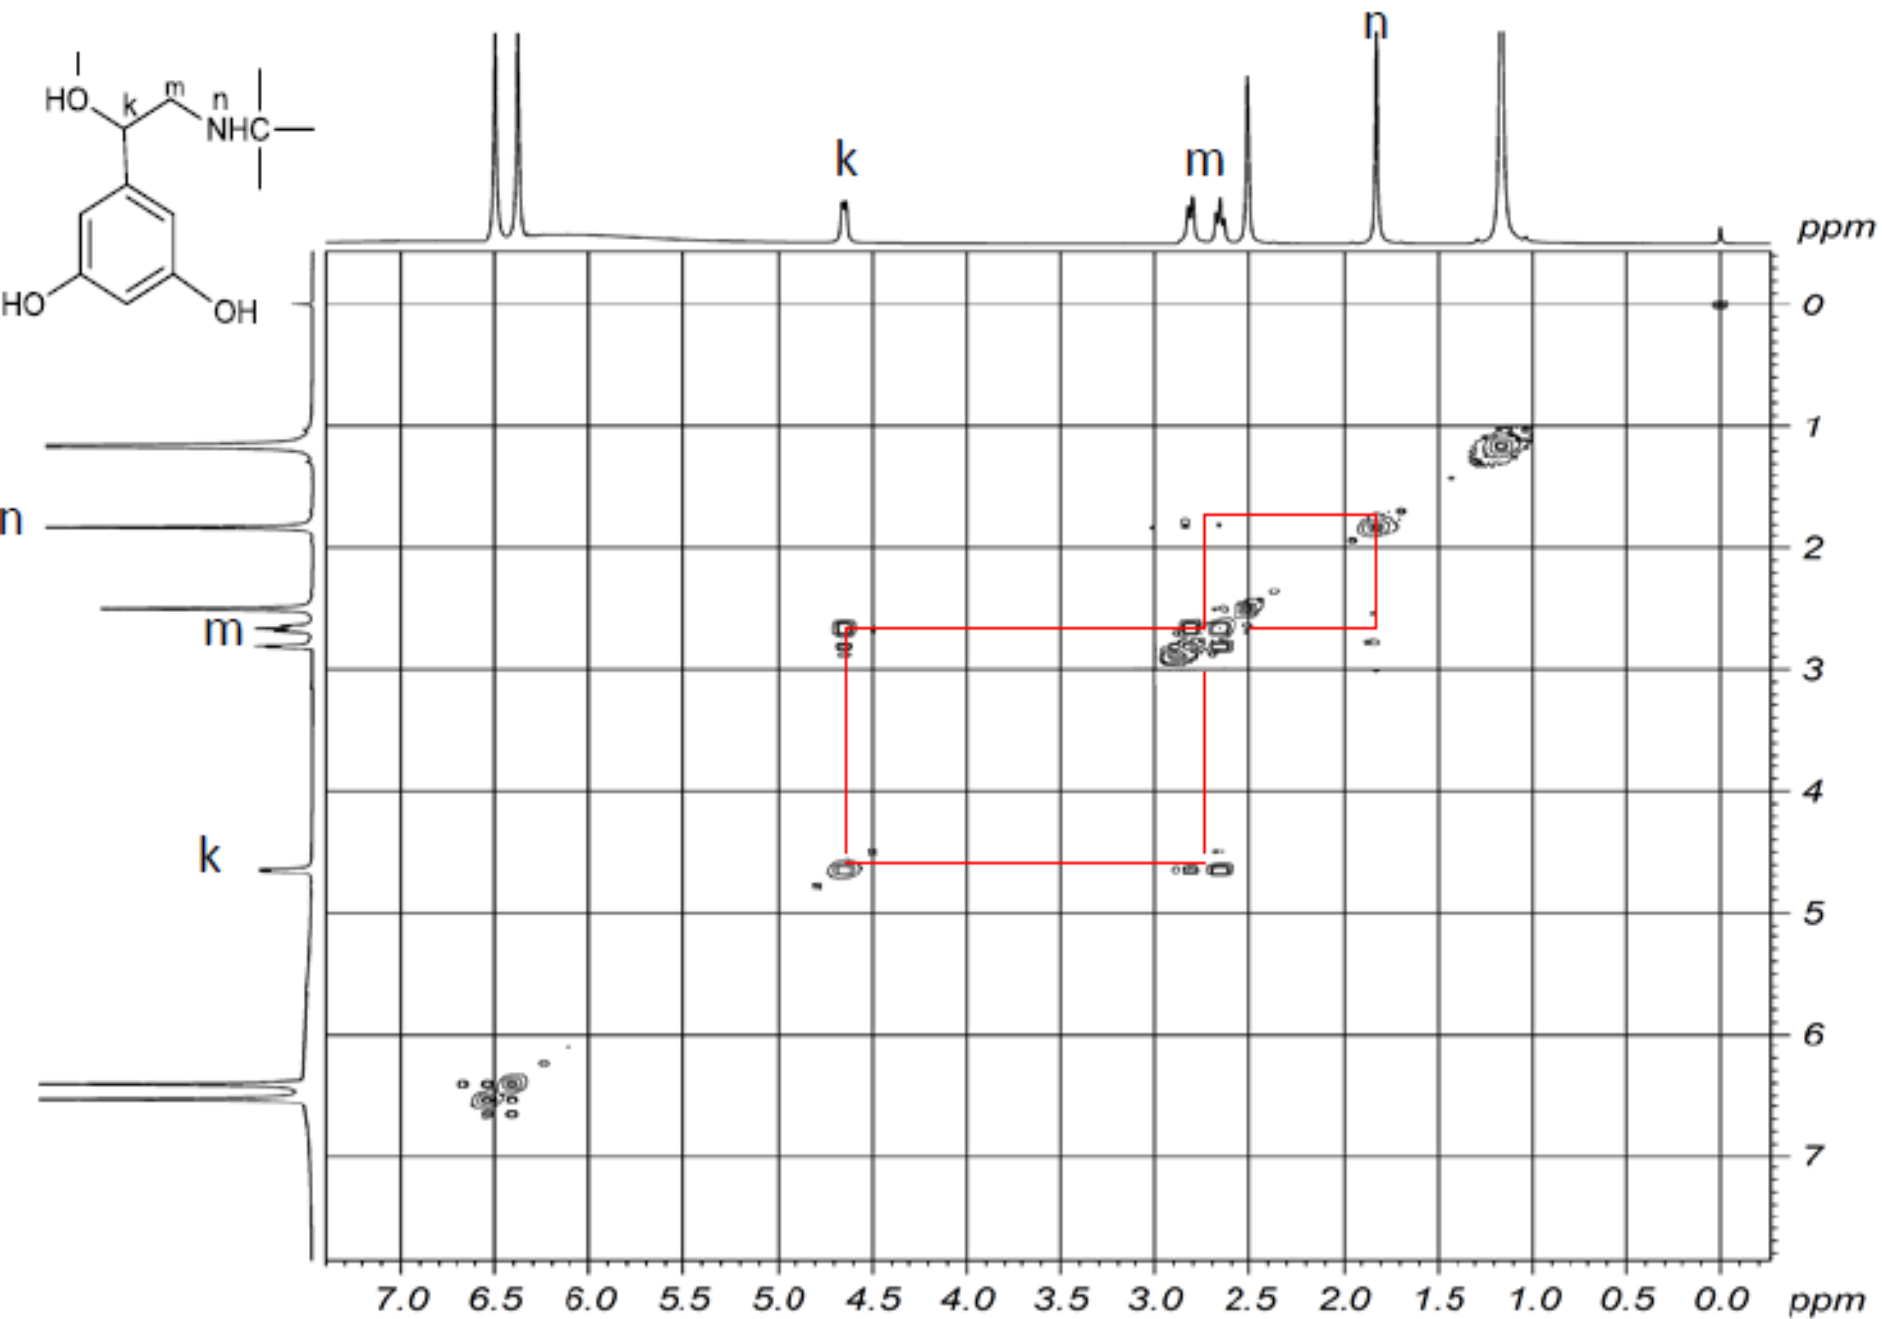

**Figure 11: COSY NMR spectra of DP-3**

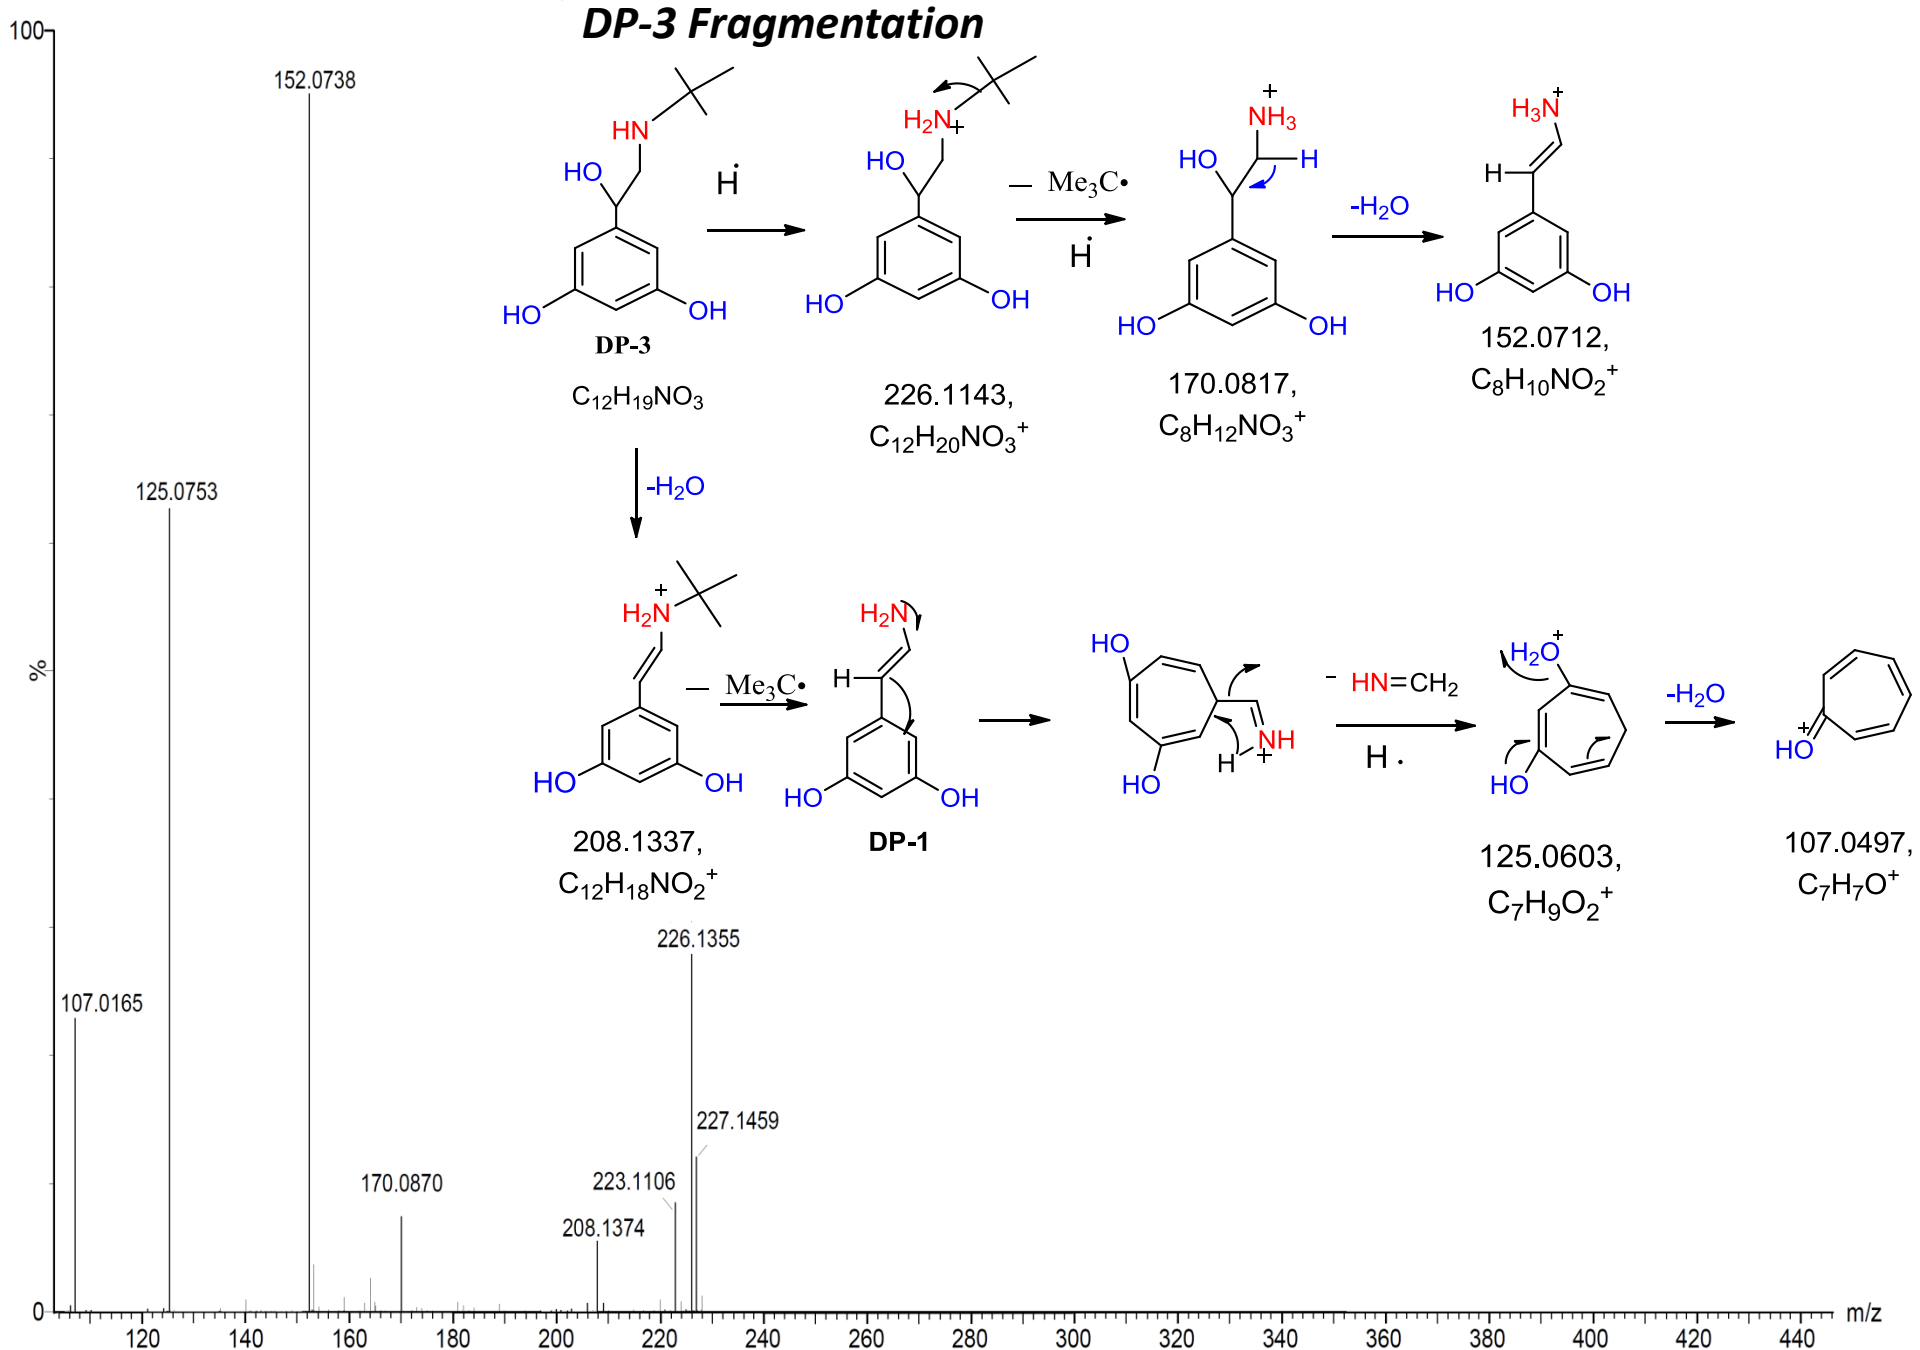

**Figure 12: Fragmentation pattern and LCMS spectra of DP-3**

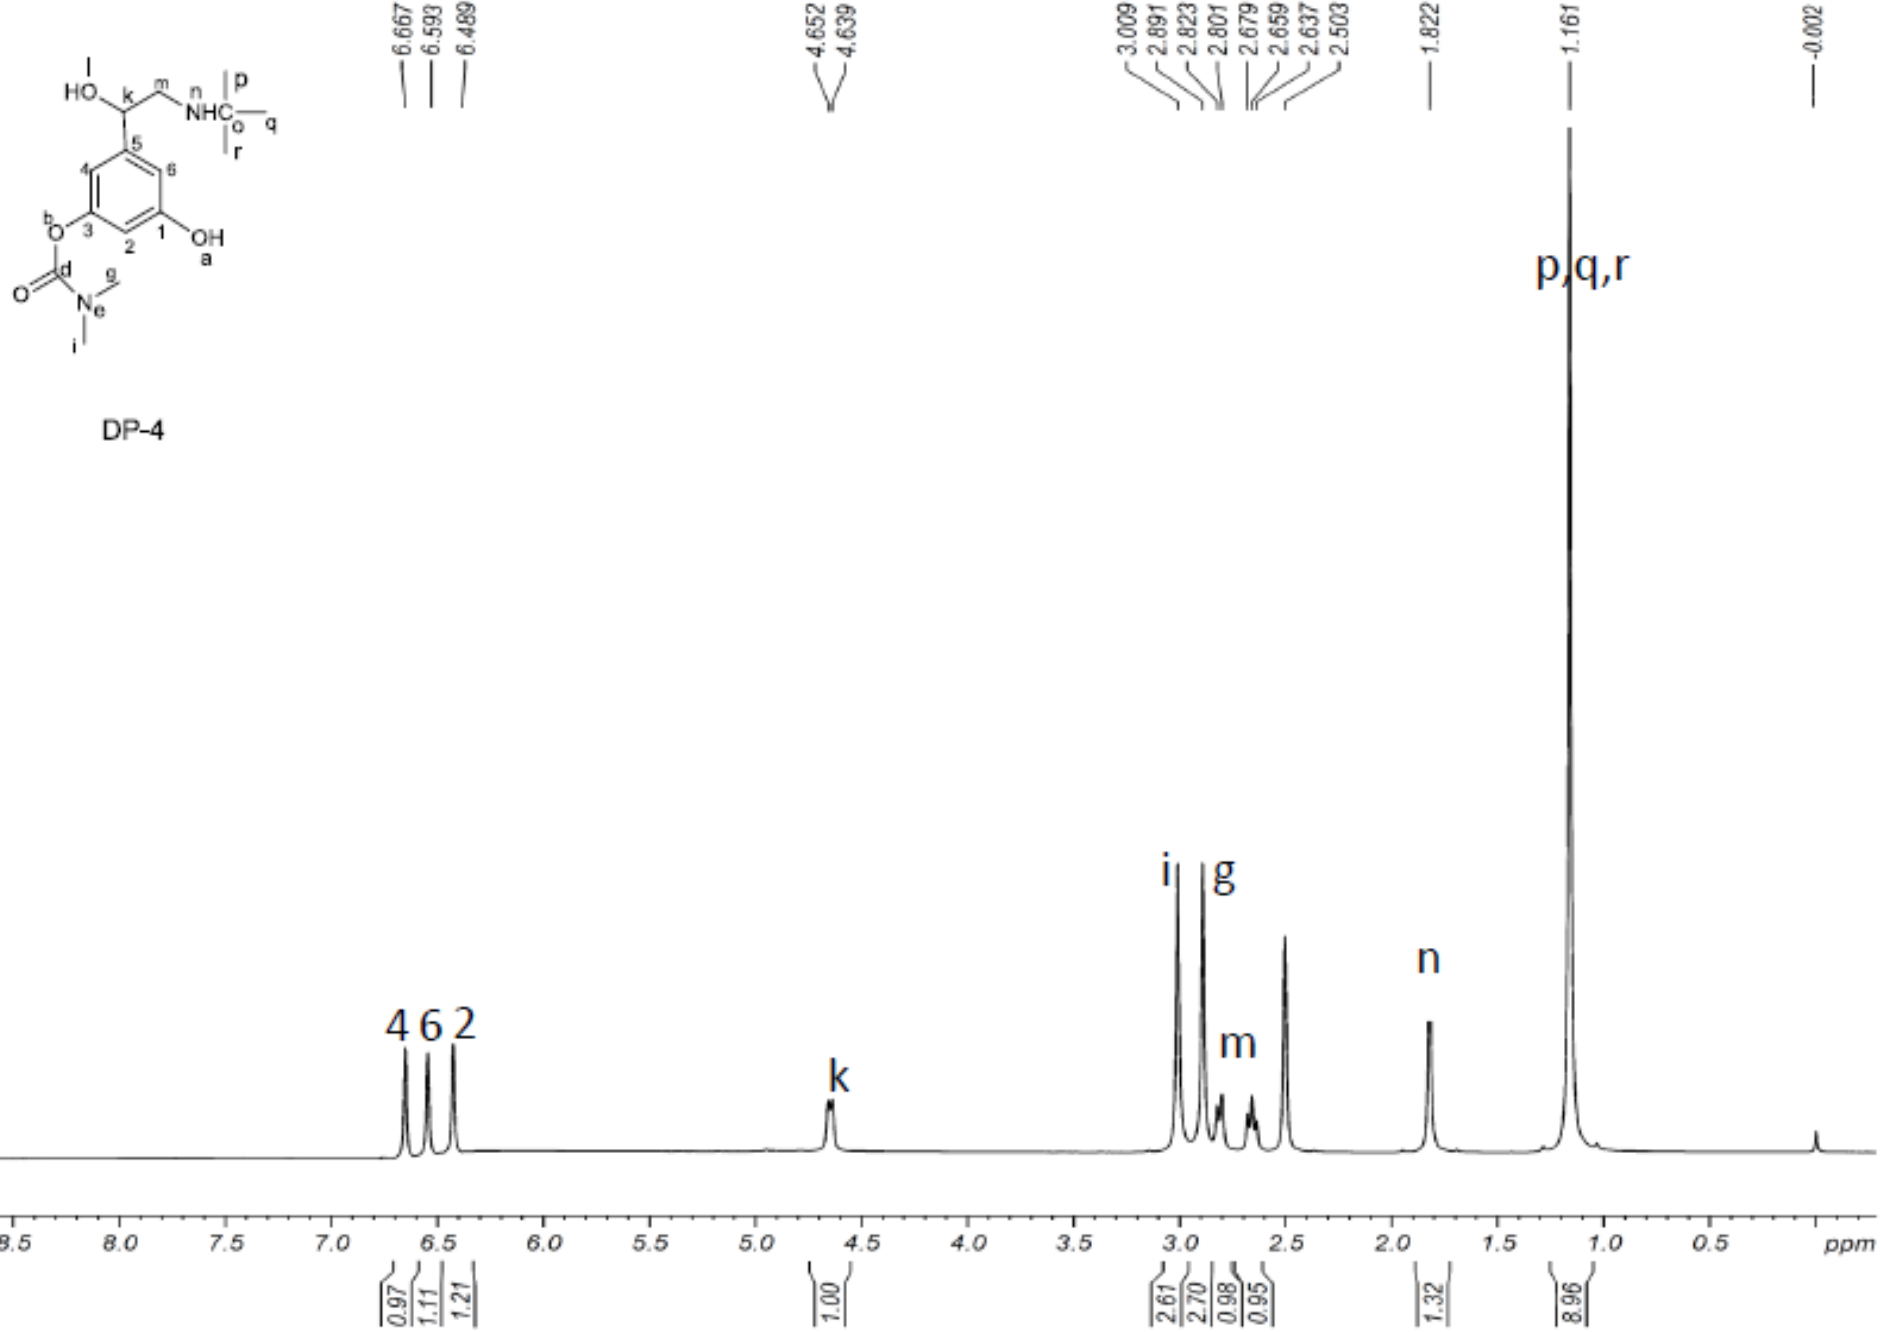

**Sfigure 13: <sup>1</sup>H NMR spectra of DP-4**

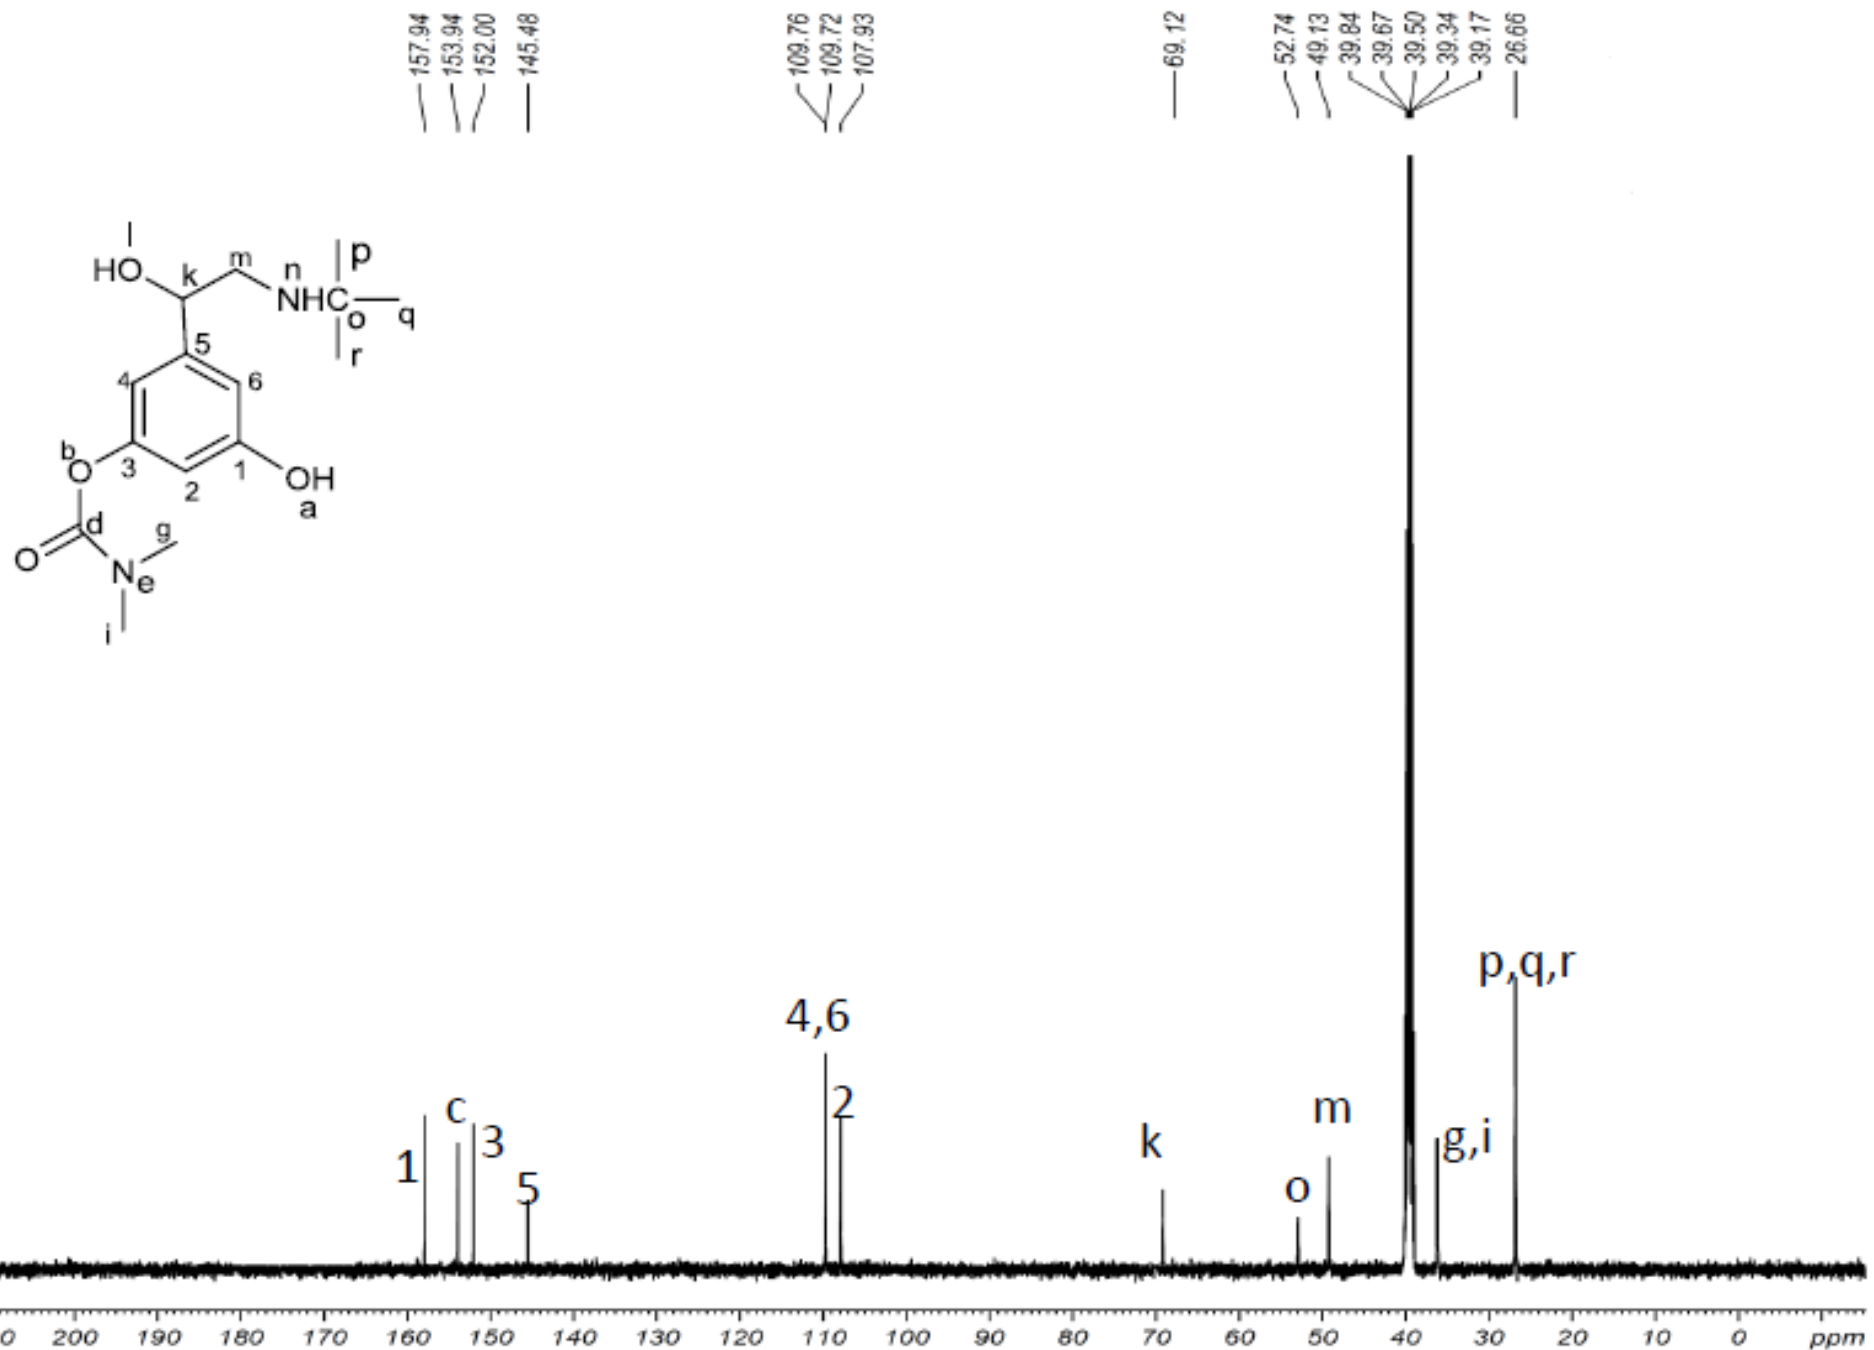

**Figure 14:**  $^{13}\text{C}$  NMR spectra of DP-4

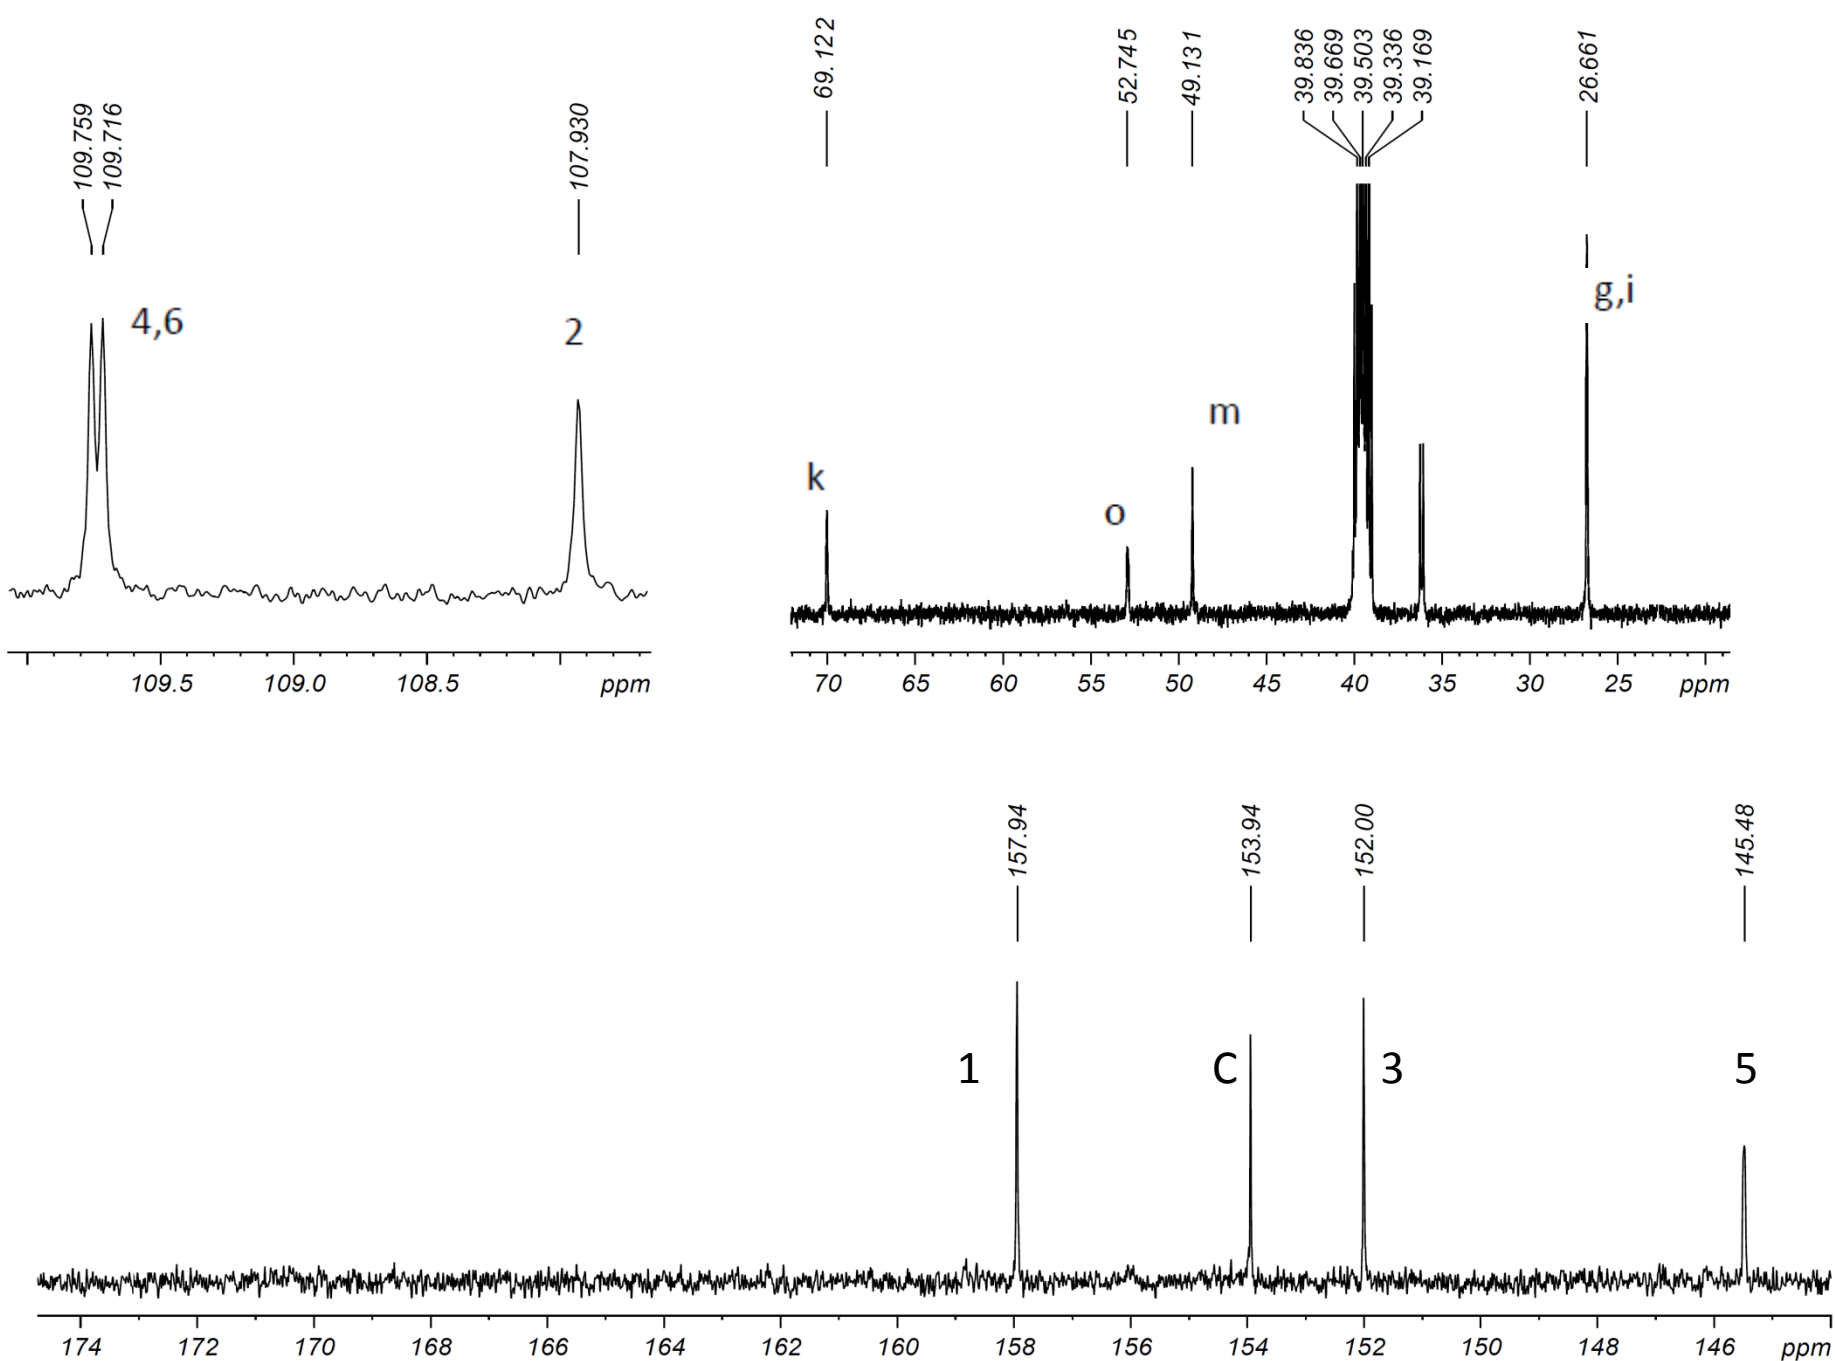

**Figure 15:**  $^{13}\text{C}$  NMR expanded spectra of DP-4

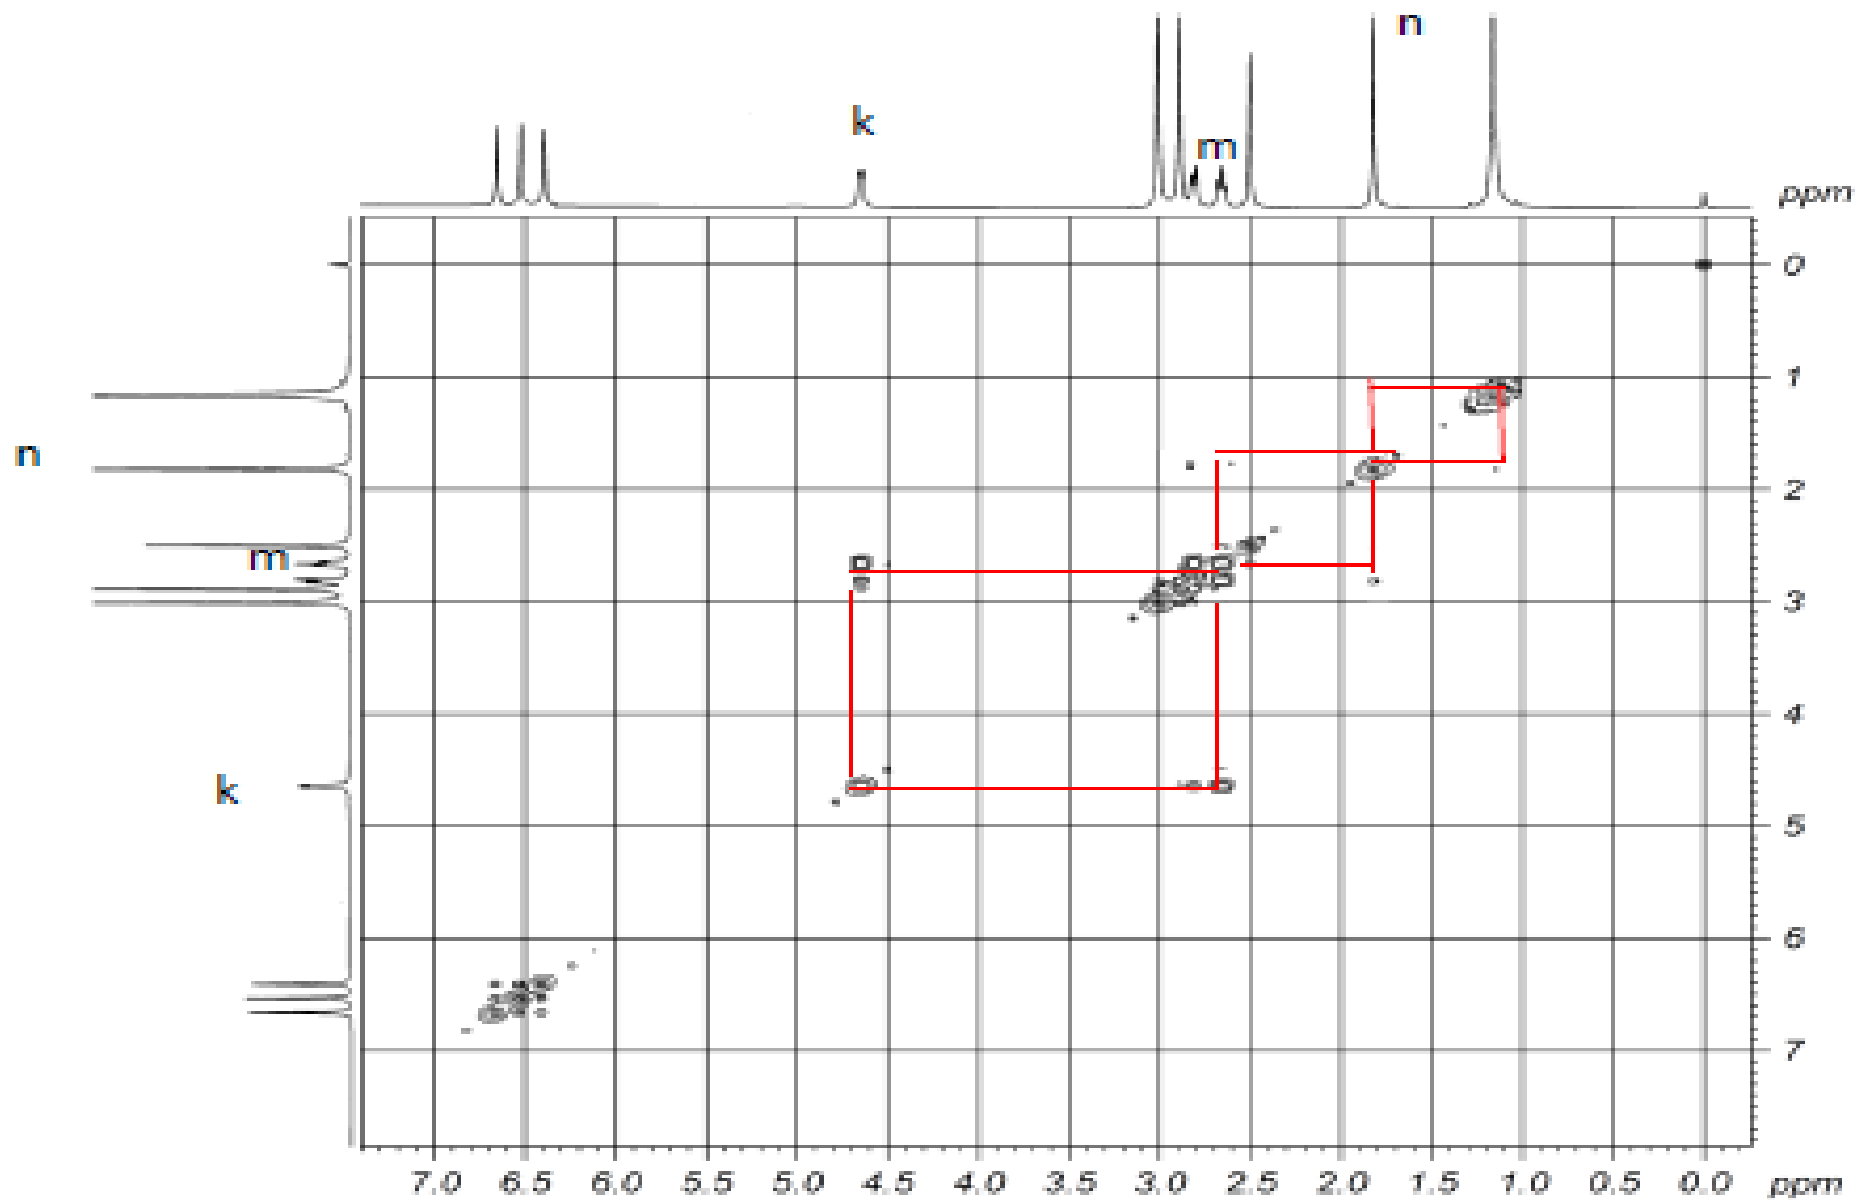

*Sfigure 16: COSY spectra of DP-4*



# DP-4 Fragmentation

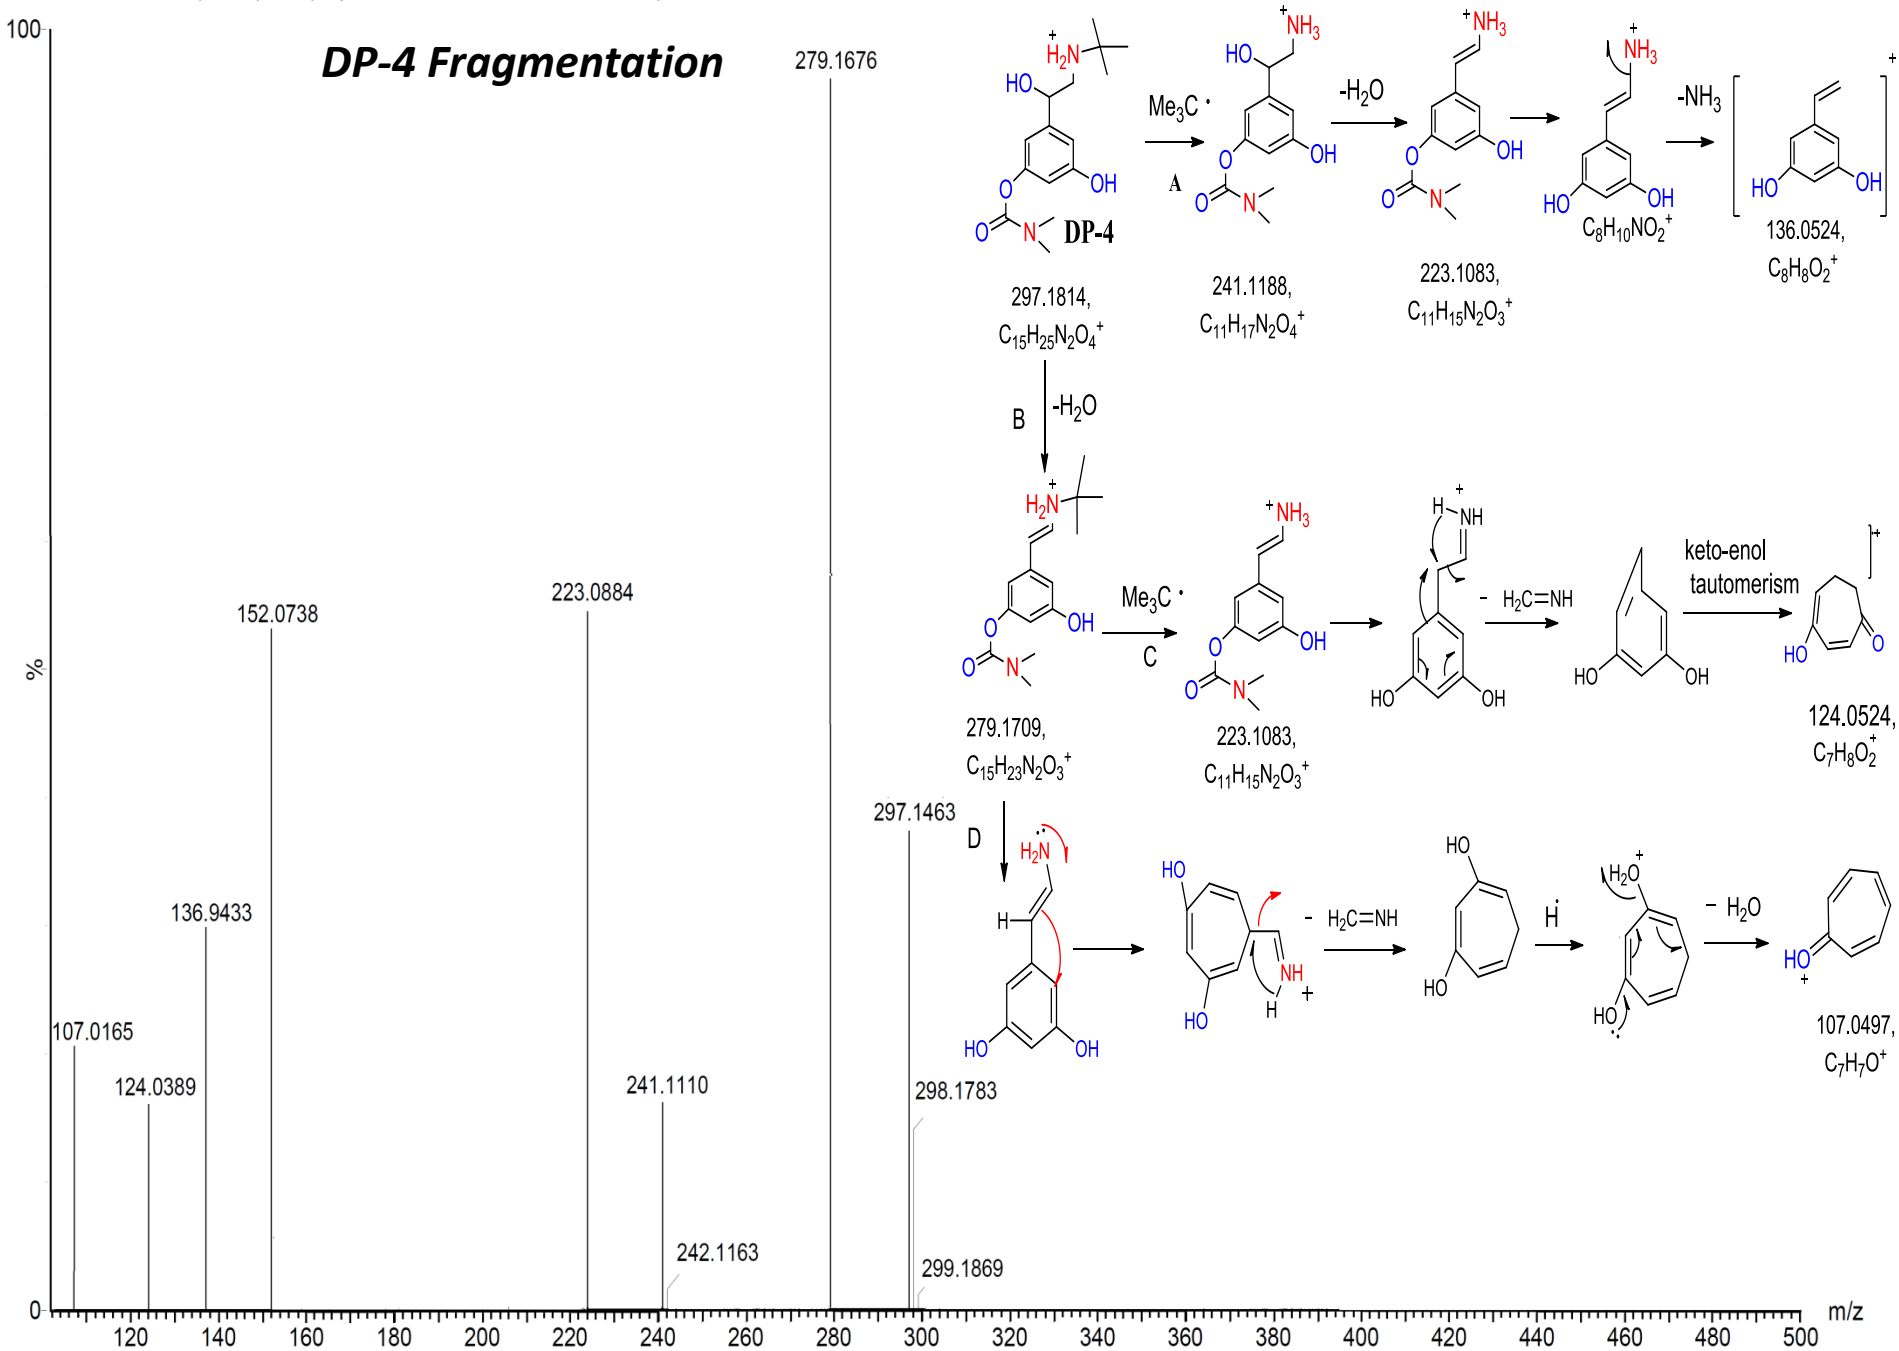

**Figure 17: Fragmentation pattern and LCMS spectra of DP-4**

# DP-5 fragmentation

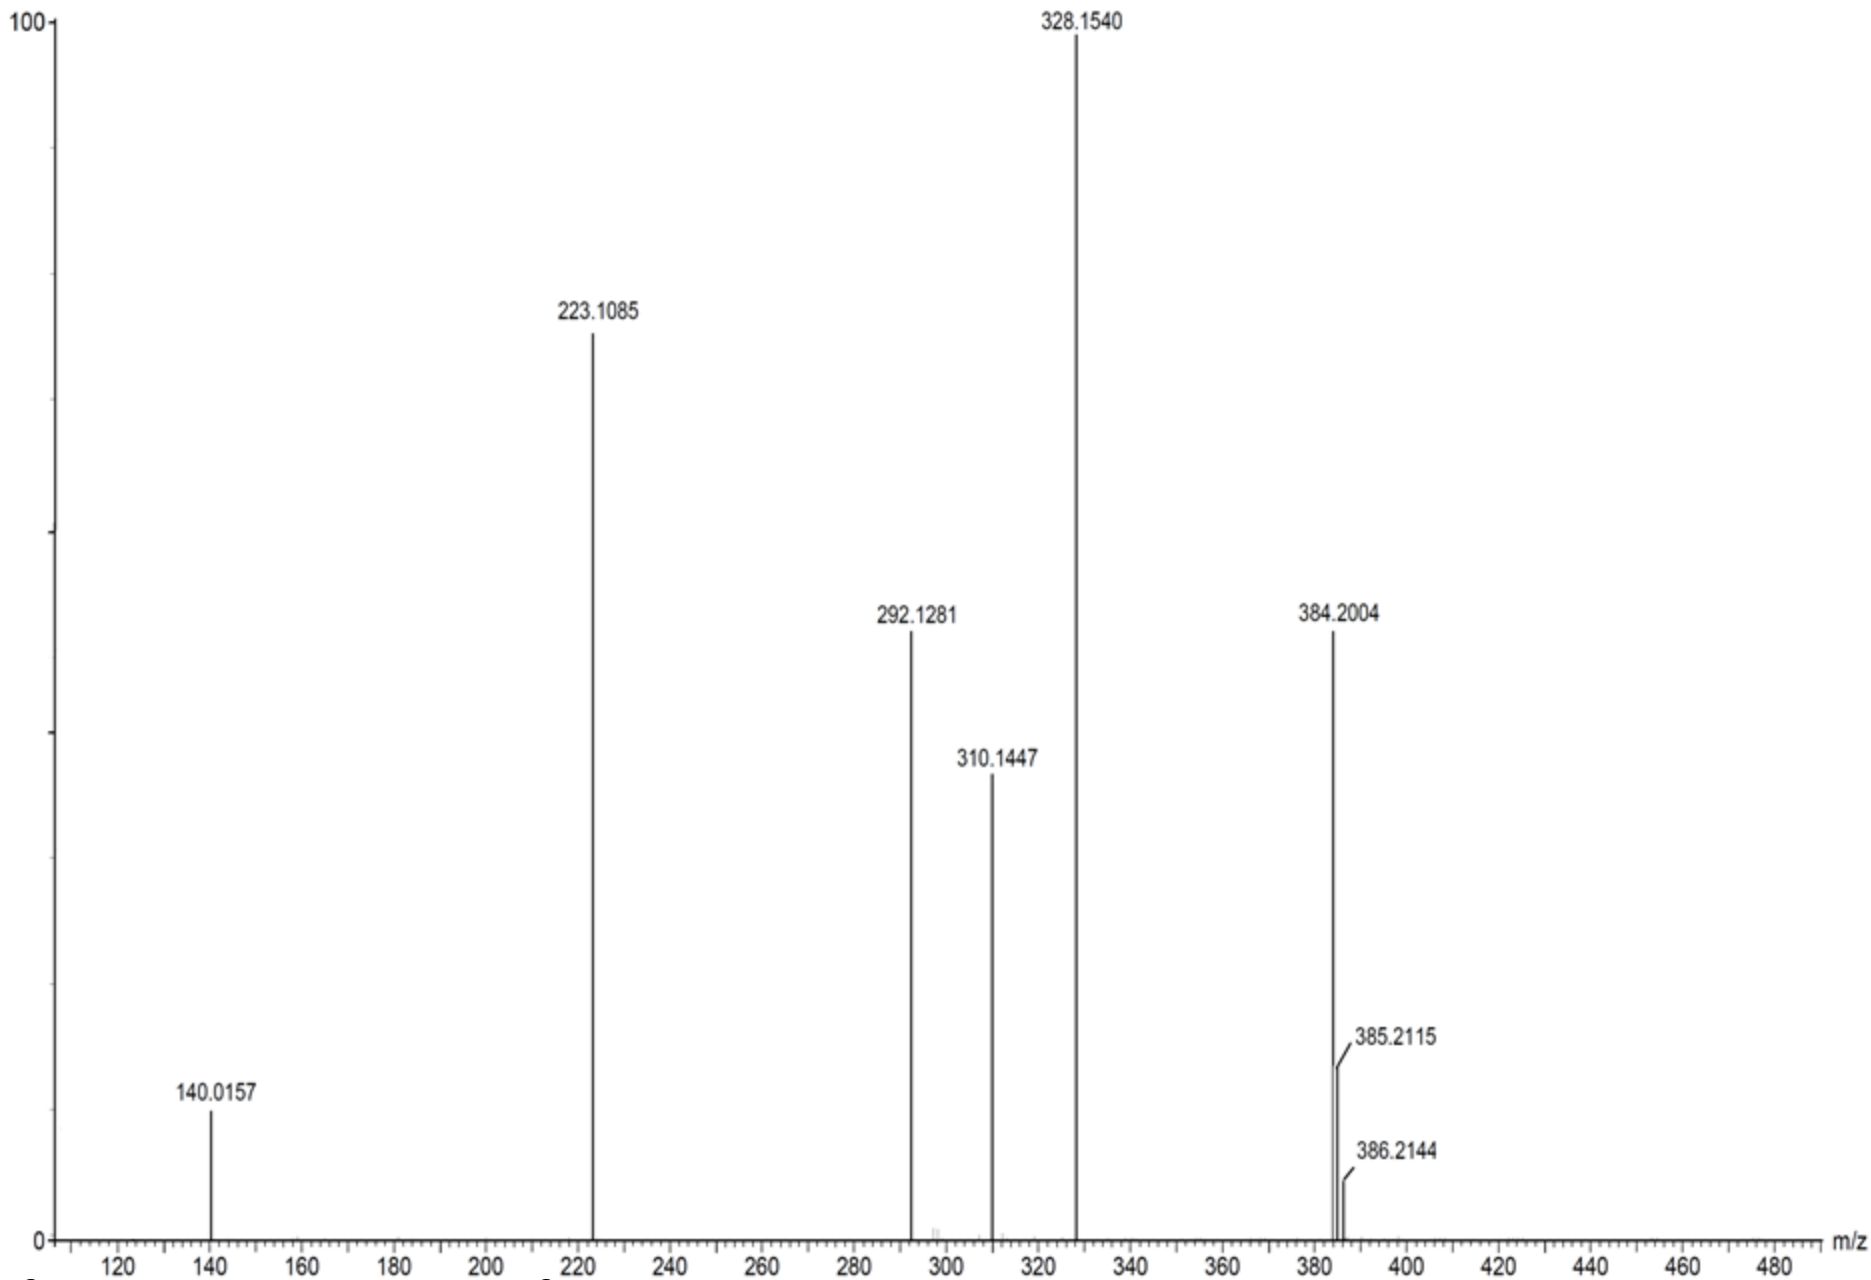

Figure 18: LCMS spectra of DP-5

## DP-5 Fragmentation

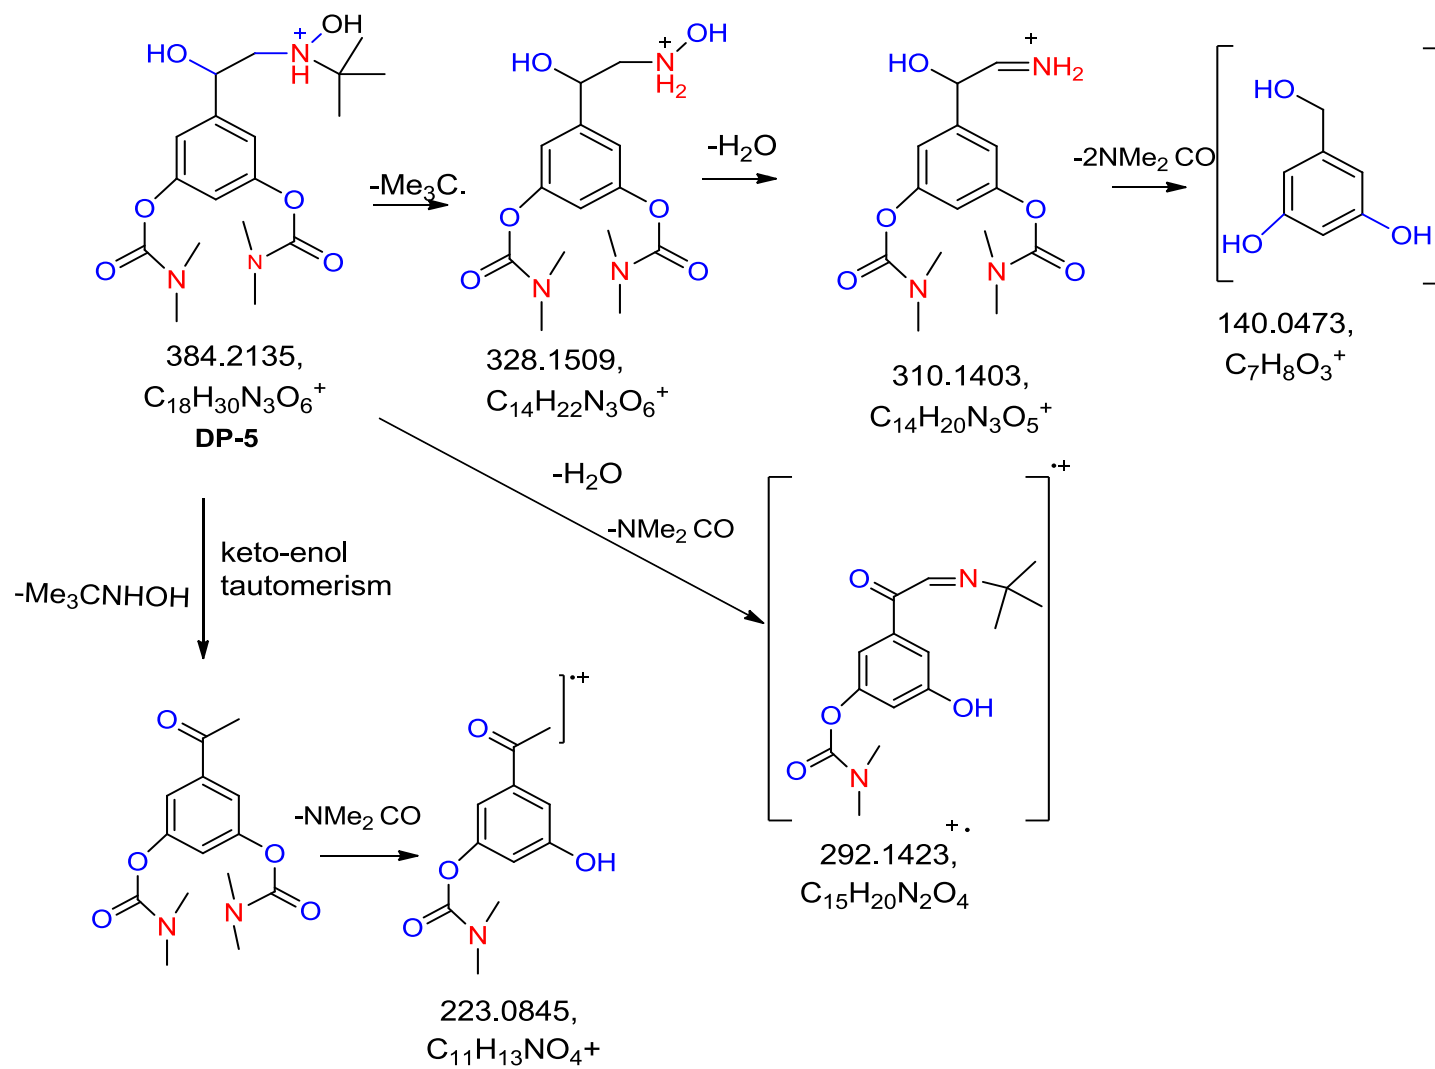

**Figure 19: Fragmentation pattern of DP-5**

# DP-6 Fragmentation

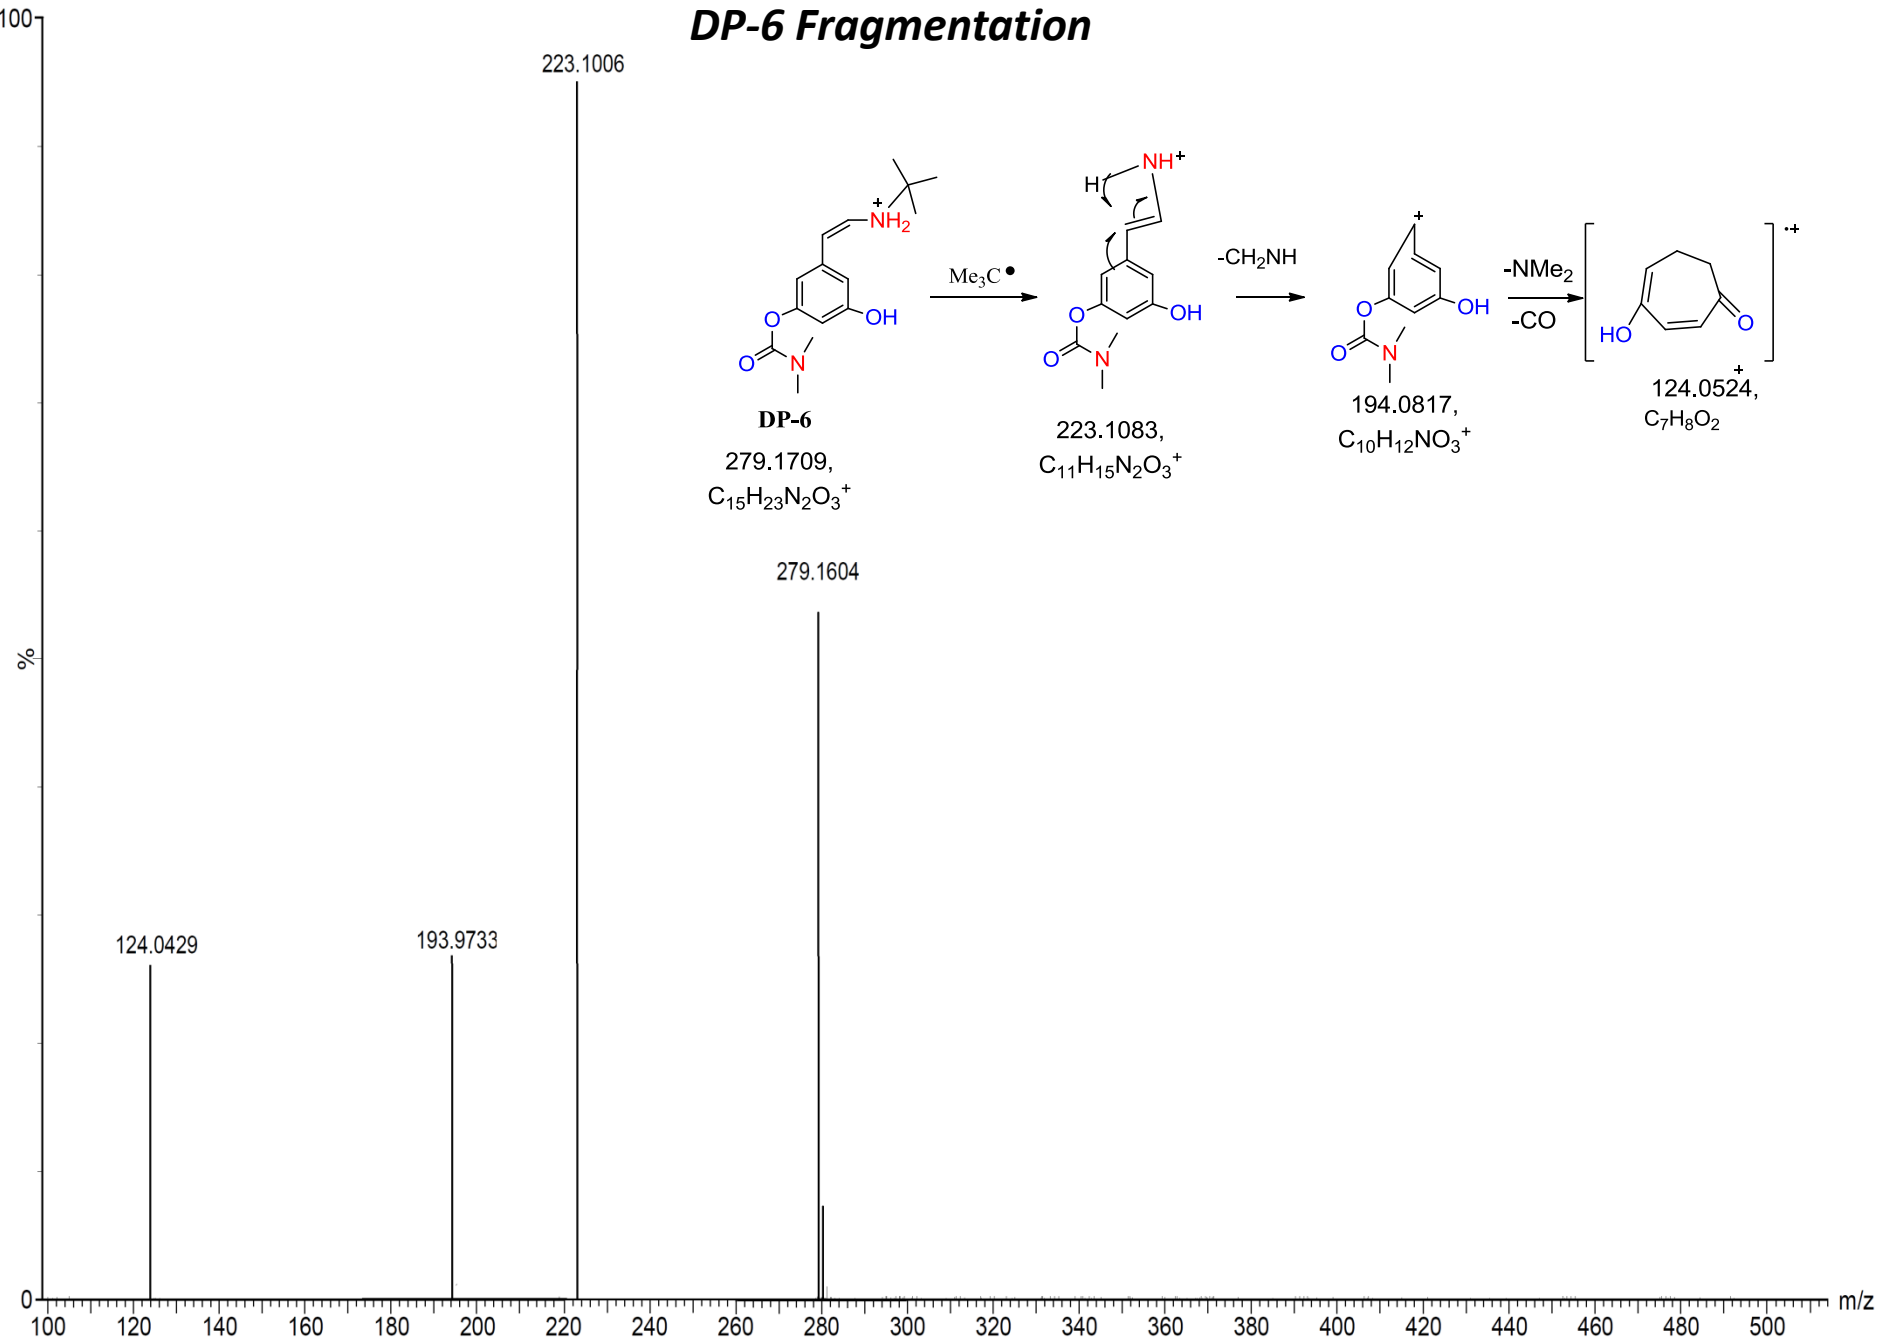

**Figure 20: Fragmentation pattern and LCMS spectra of DP-6**

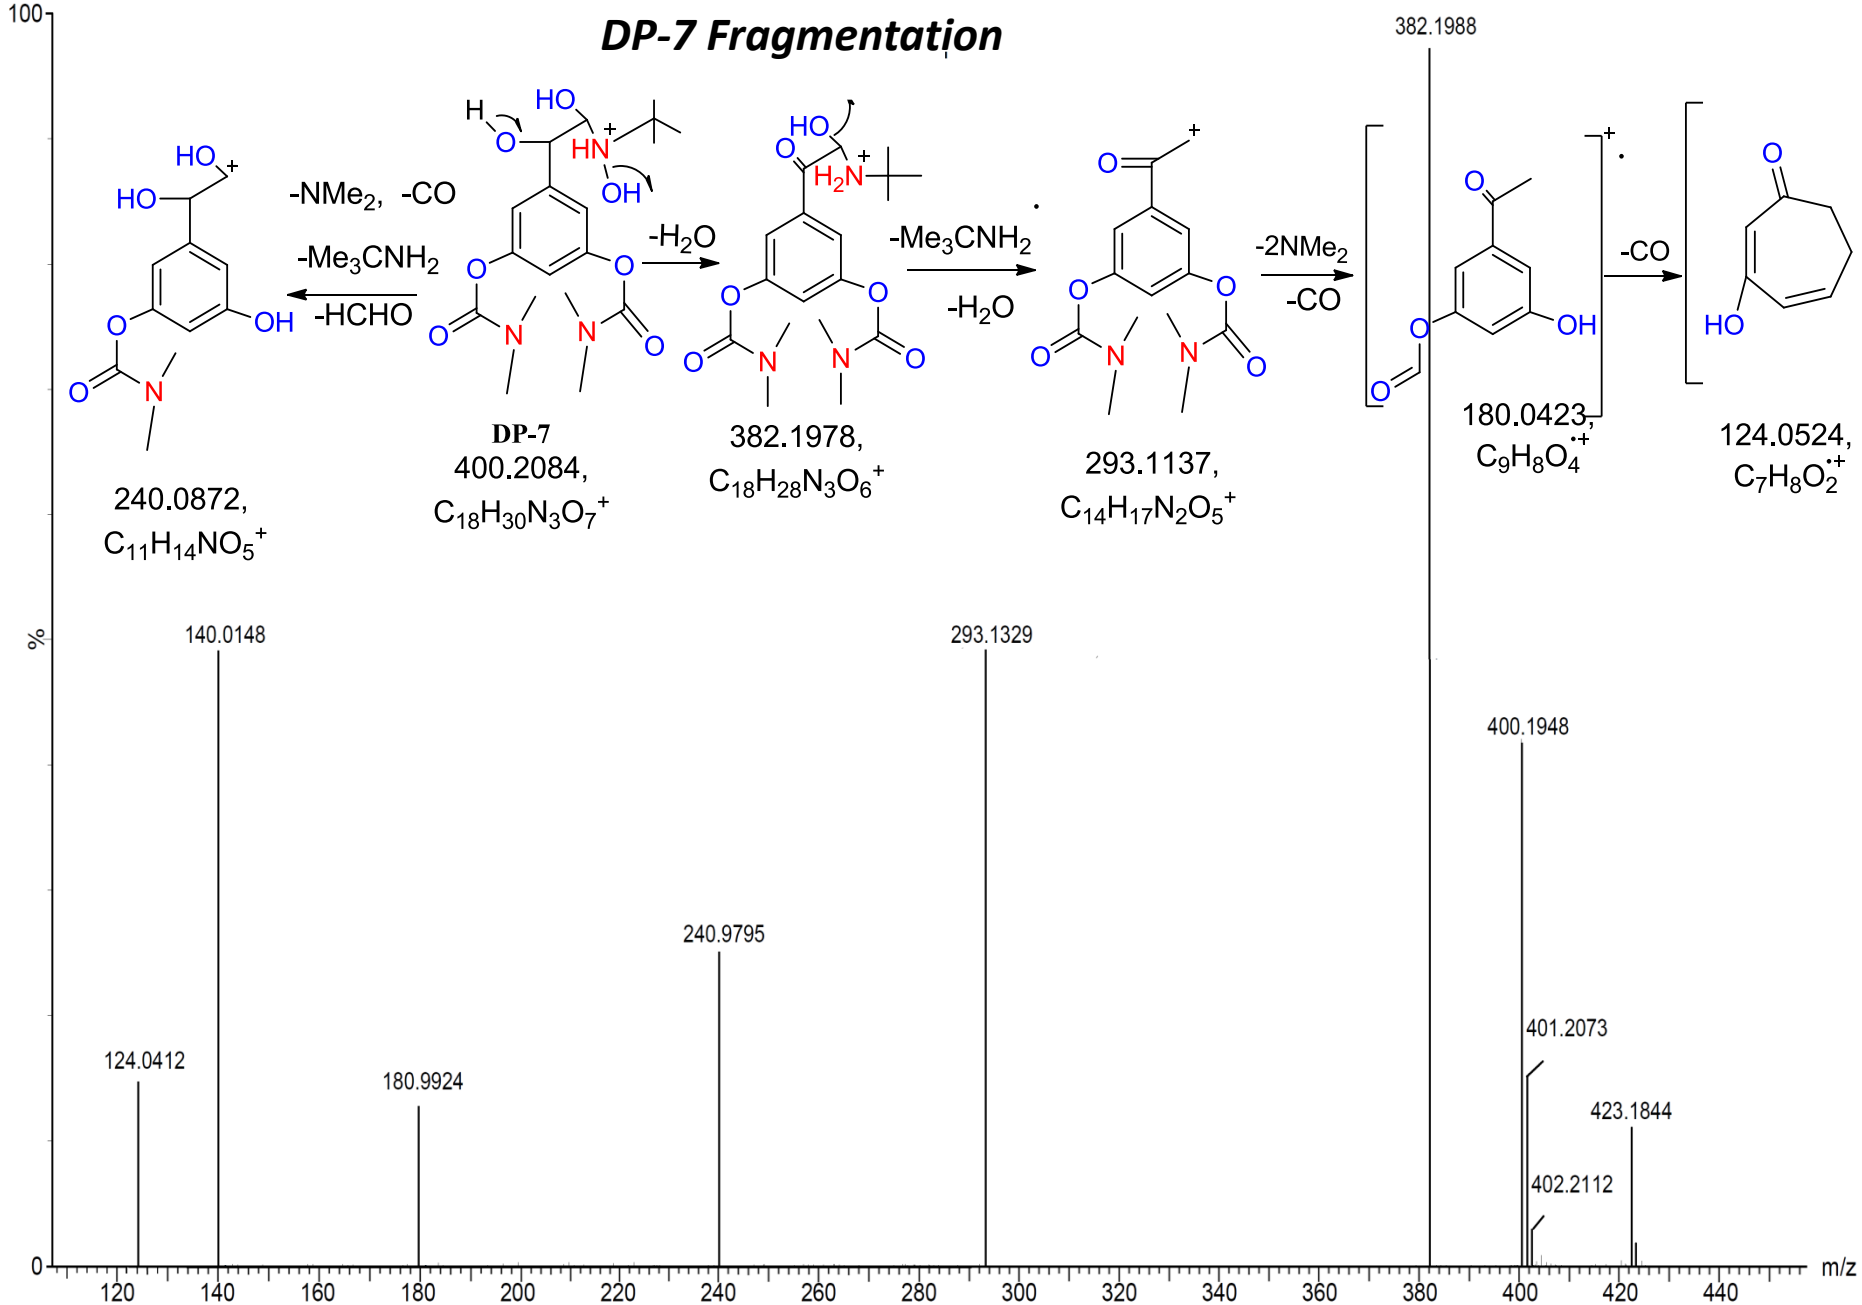

**Figure 21: Fragmentation pattern and LCMS spectra of DP-7**

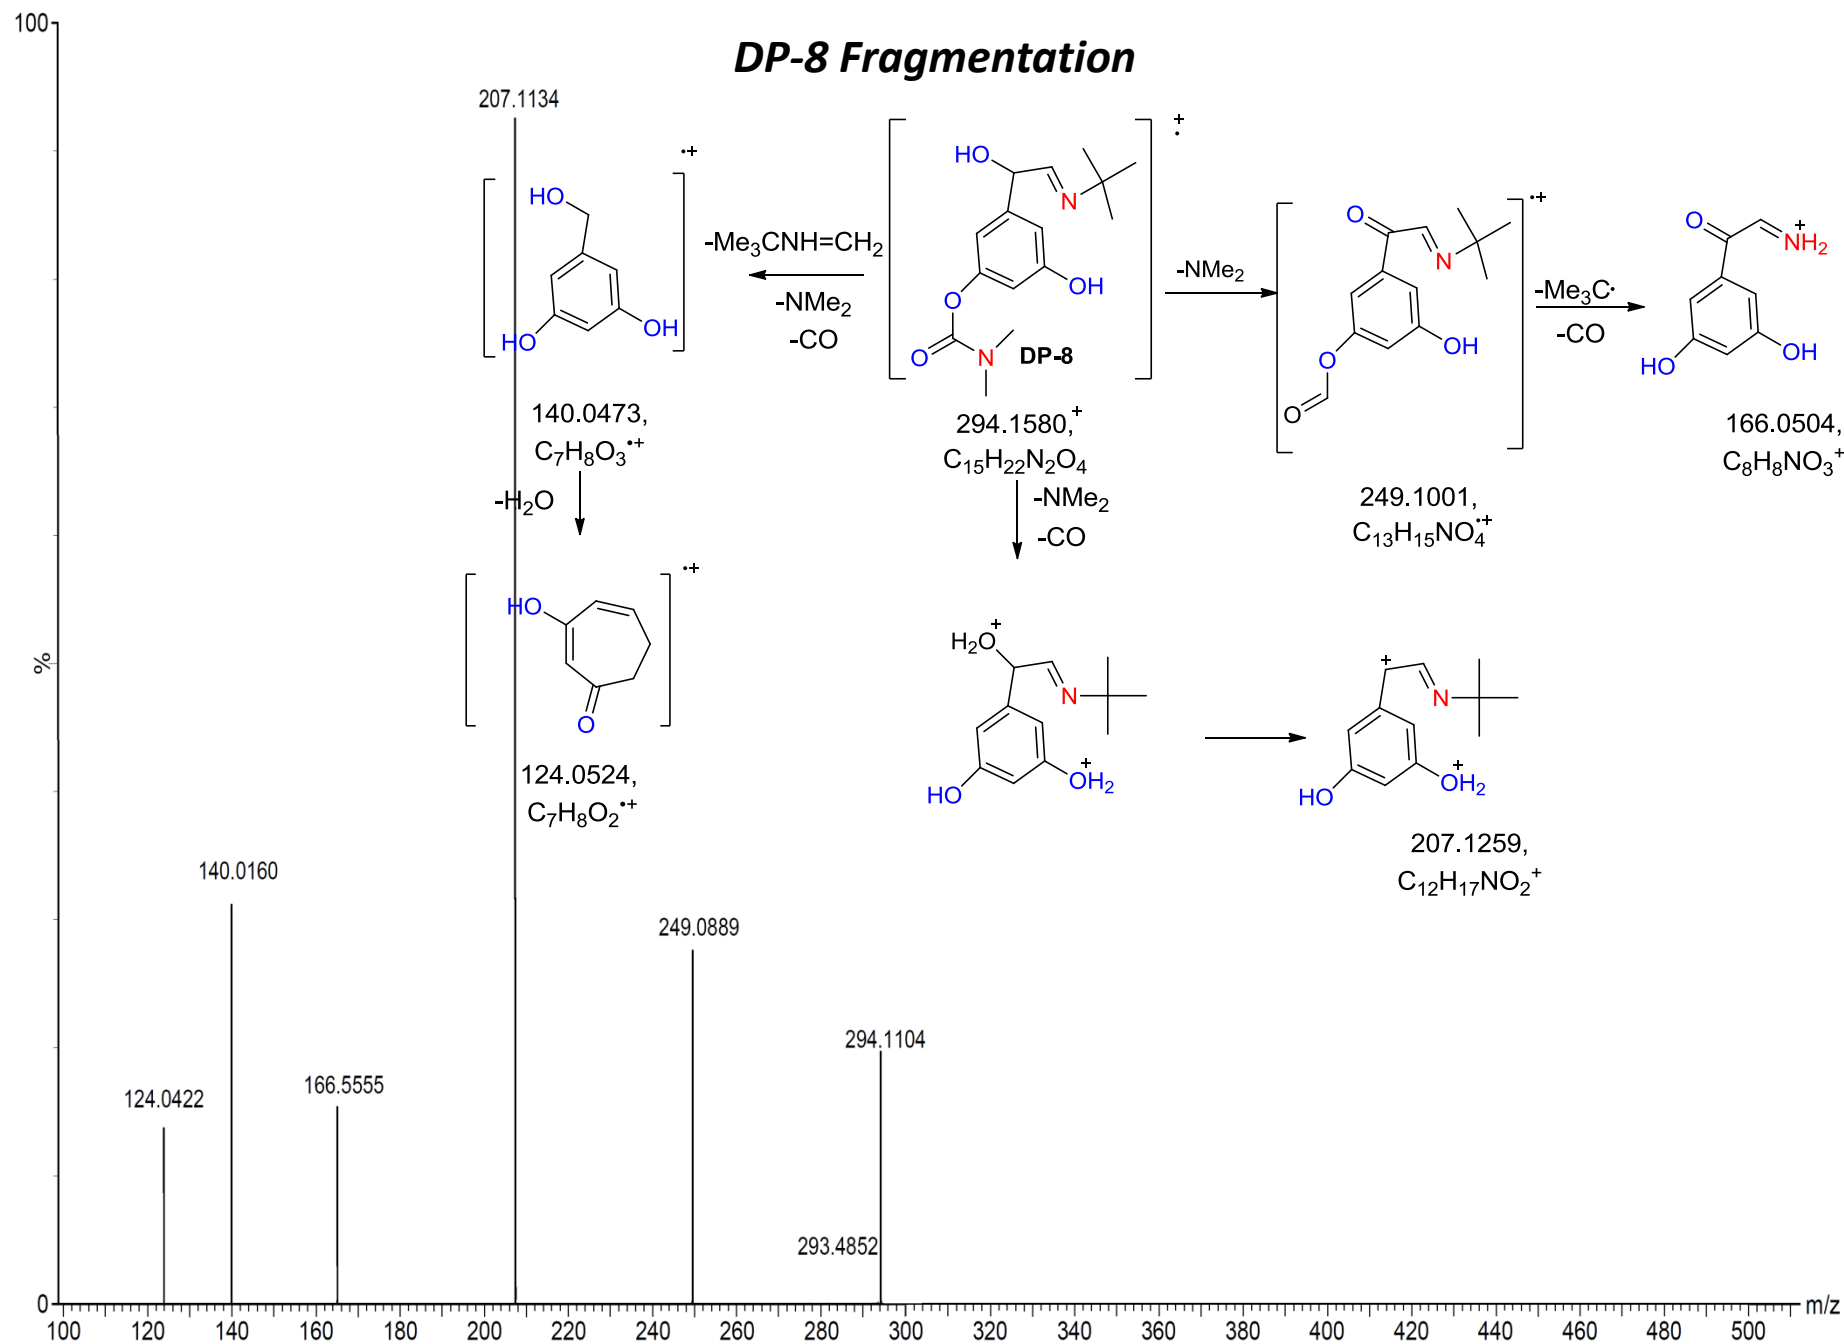

**Figure 22: Fragmentation pattern and LCMS spectra of DP-8**

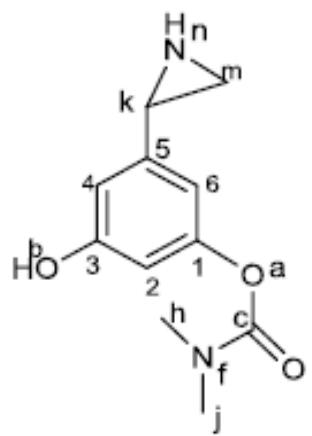

DP-9

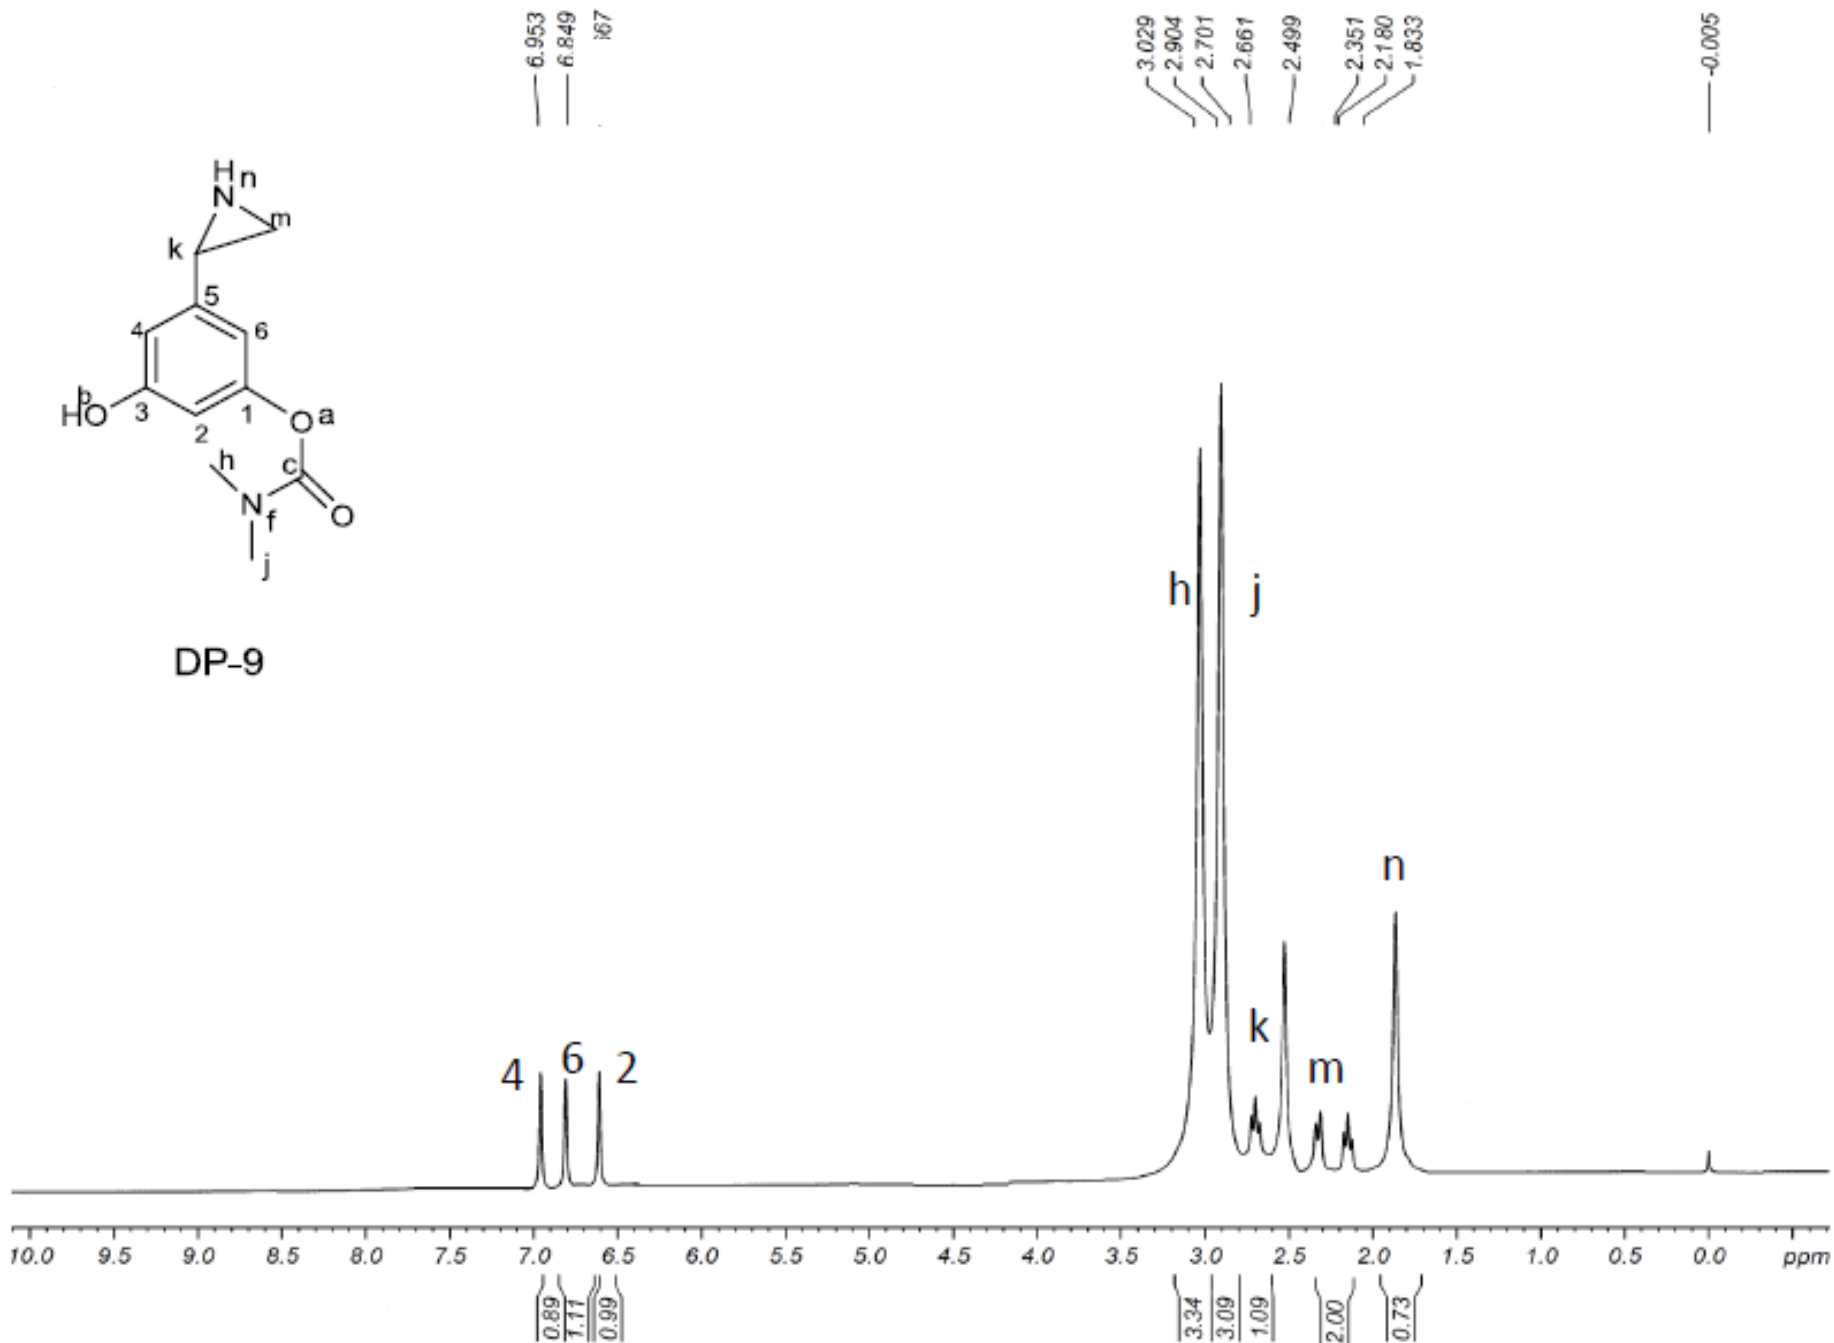

Figure 23: <sup>1</sup>H NMR spectra of DP-9

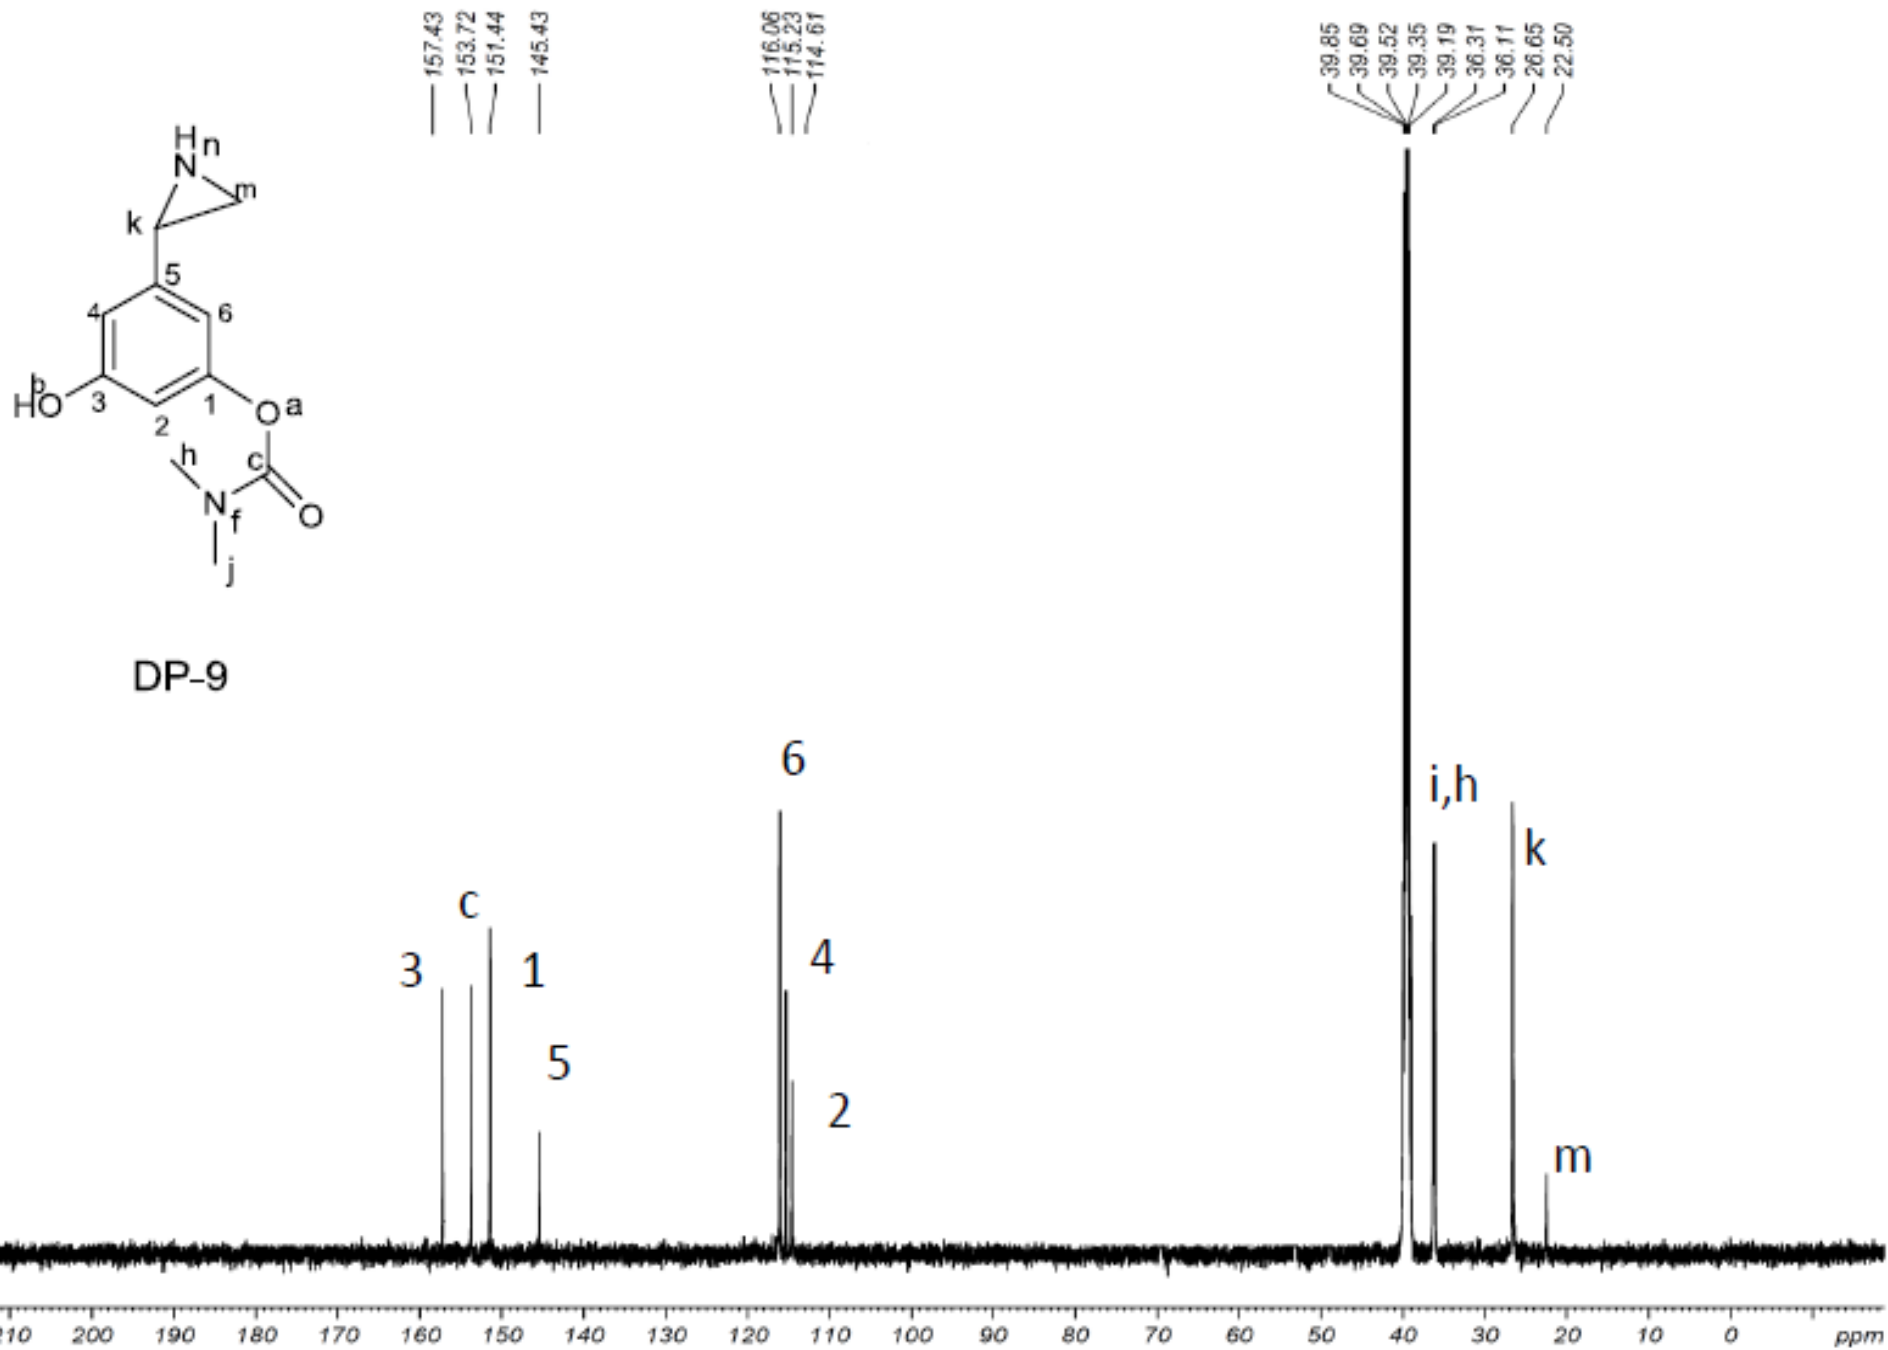

**Figure 24:** <sup>13</sup>C NMR spectra of DP-9



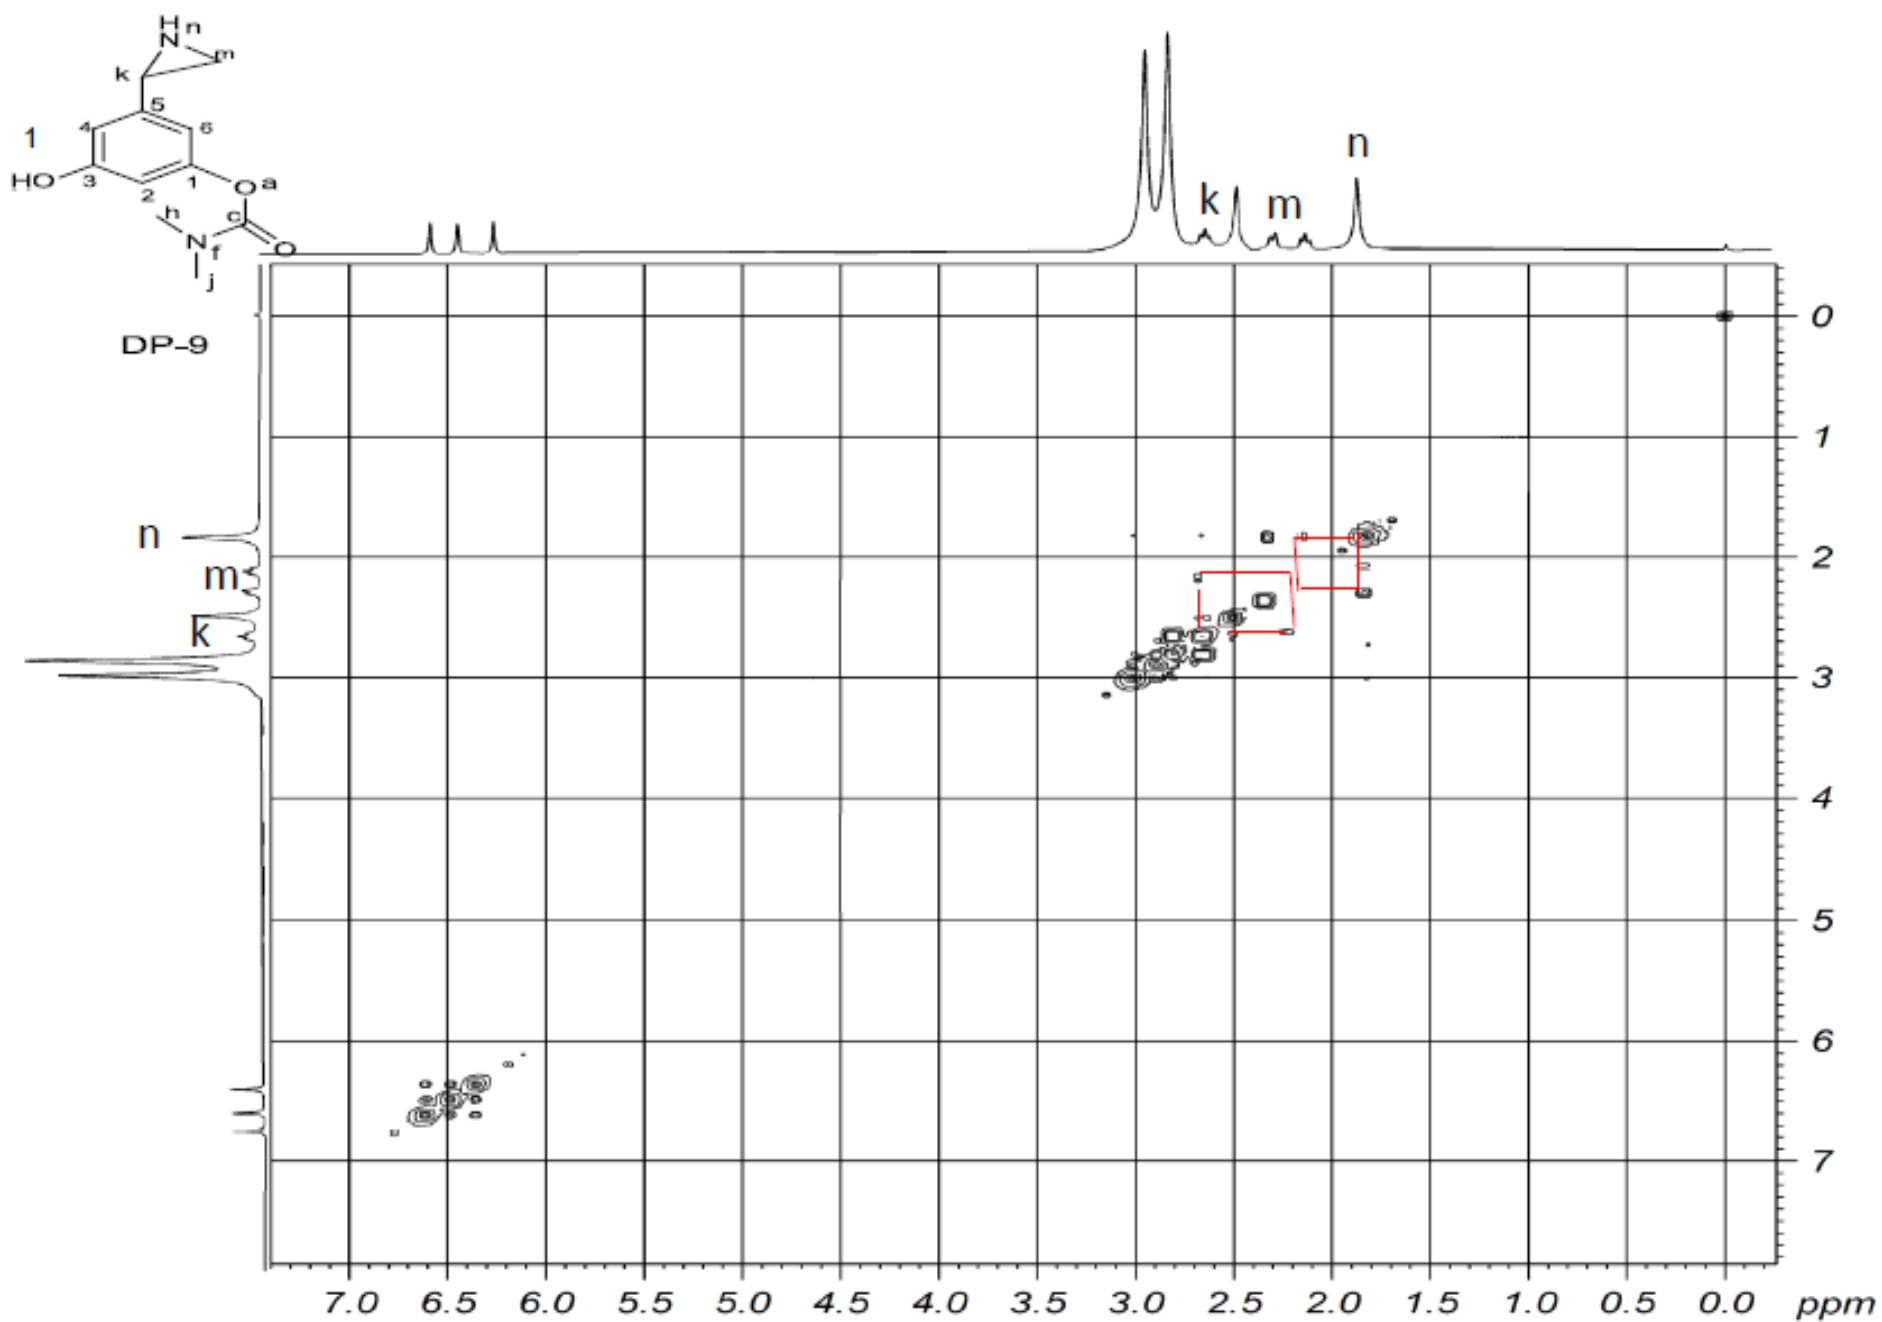

**Figure 25: COSY spectra of DP-9**

## DP-9 Fragmentation

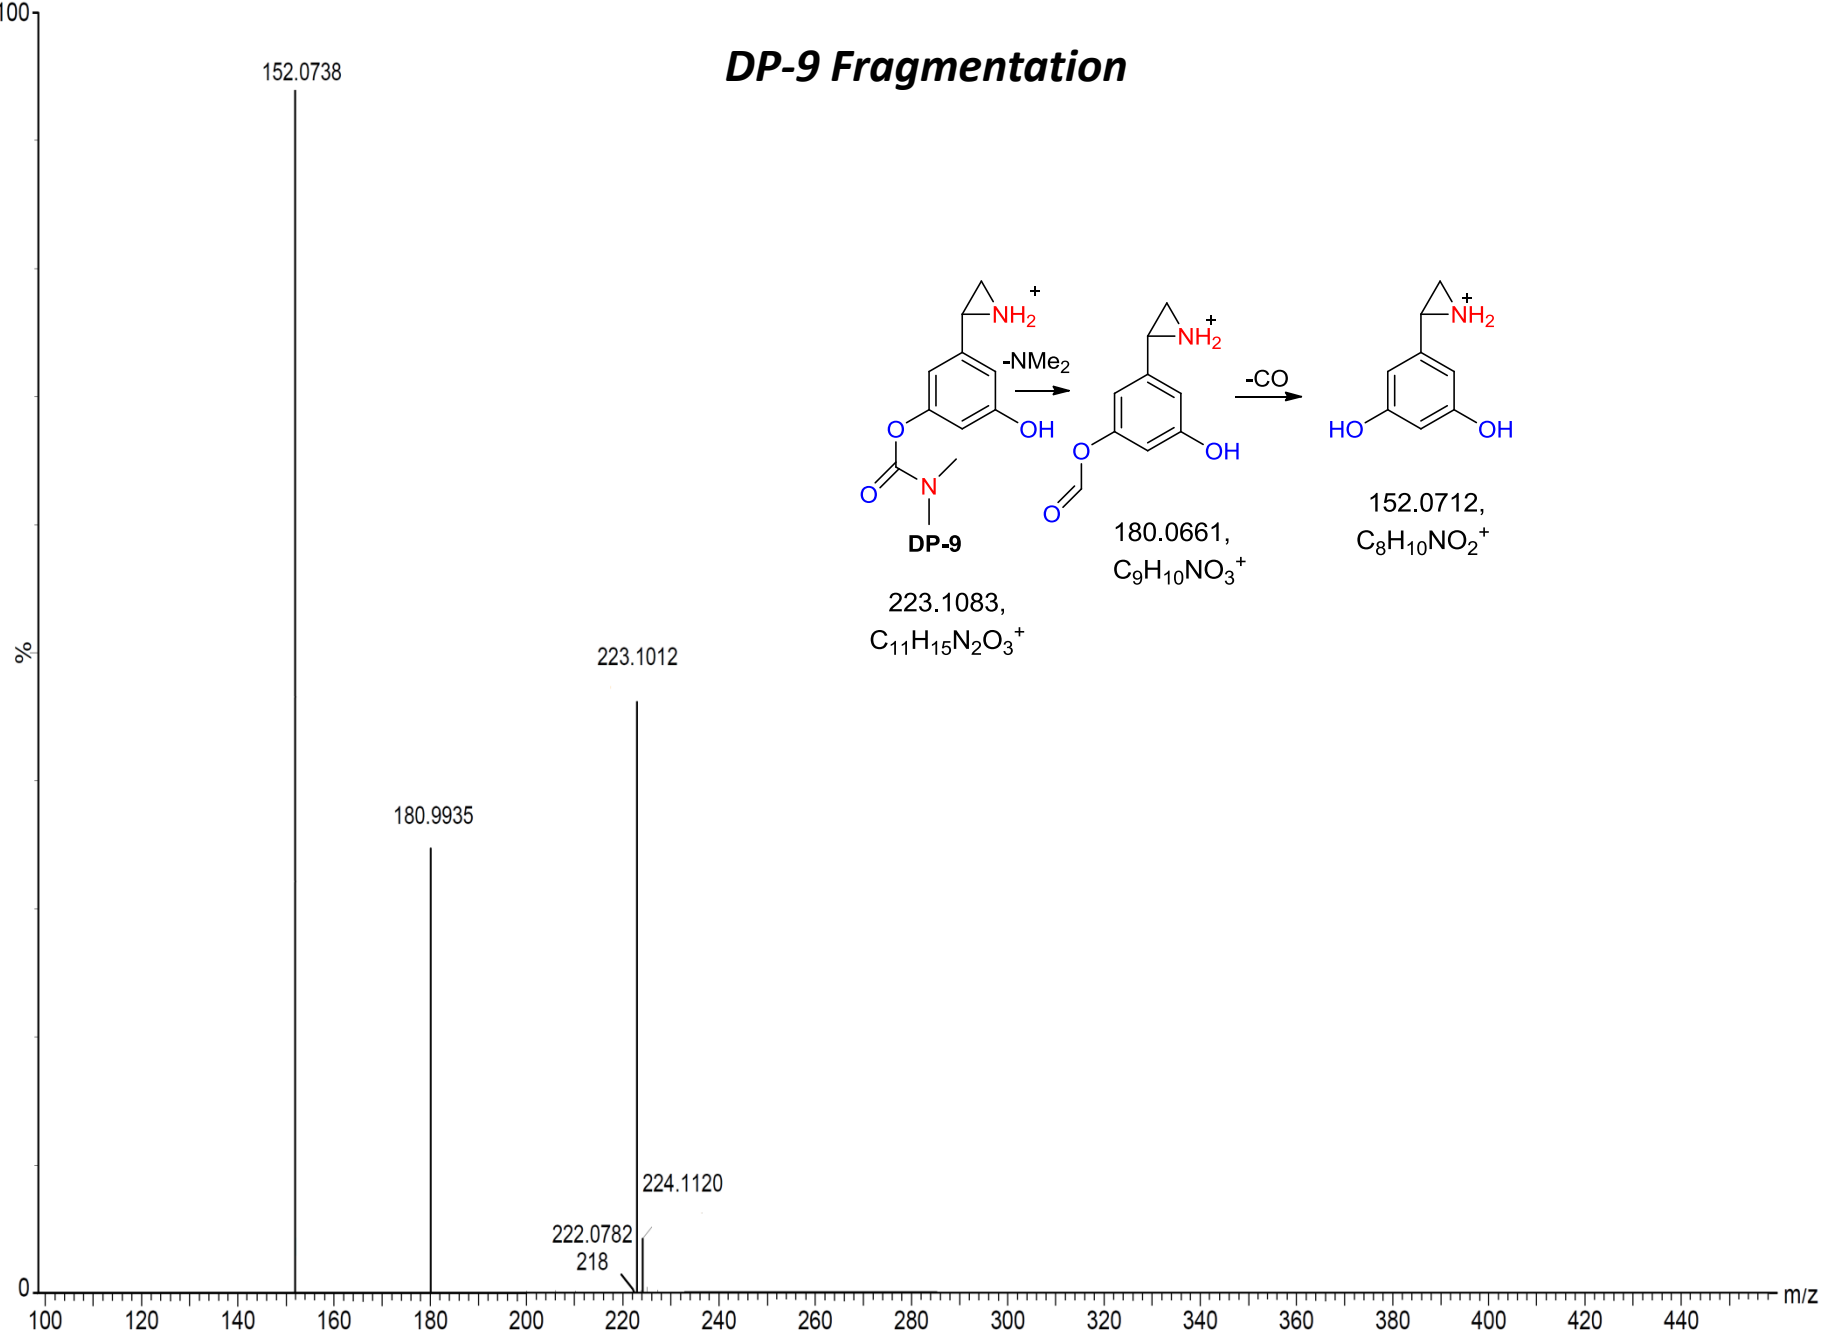

**Figure 26: Fragmentation pattern and LCMS spectra of DP-9**

### DP-10 Fragmentation

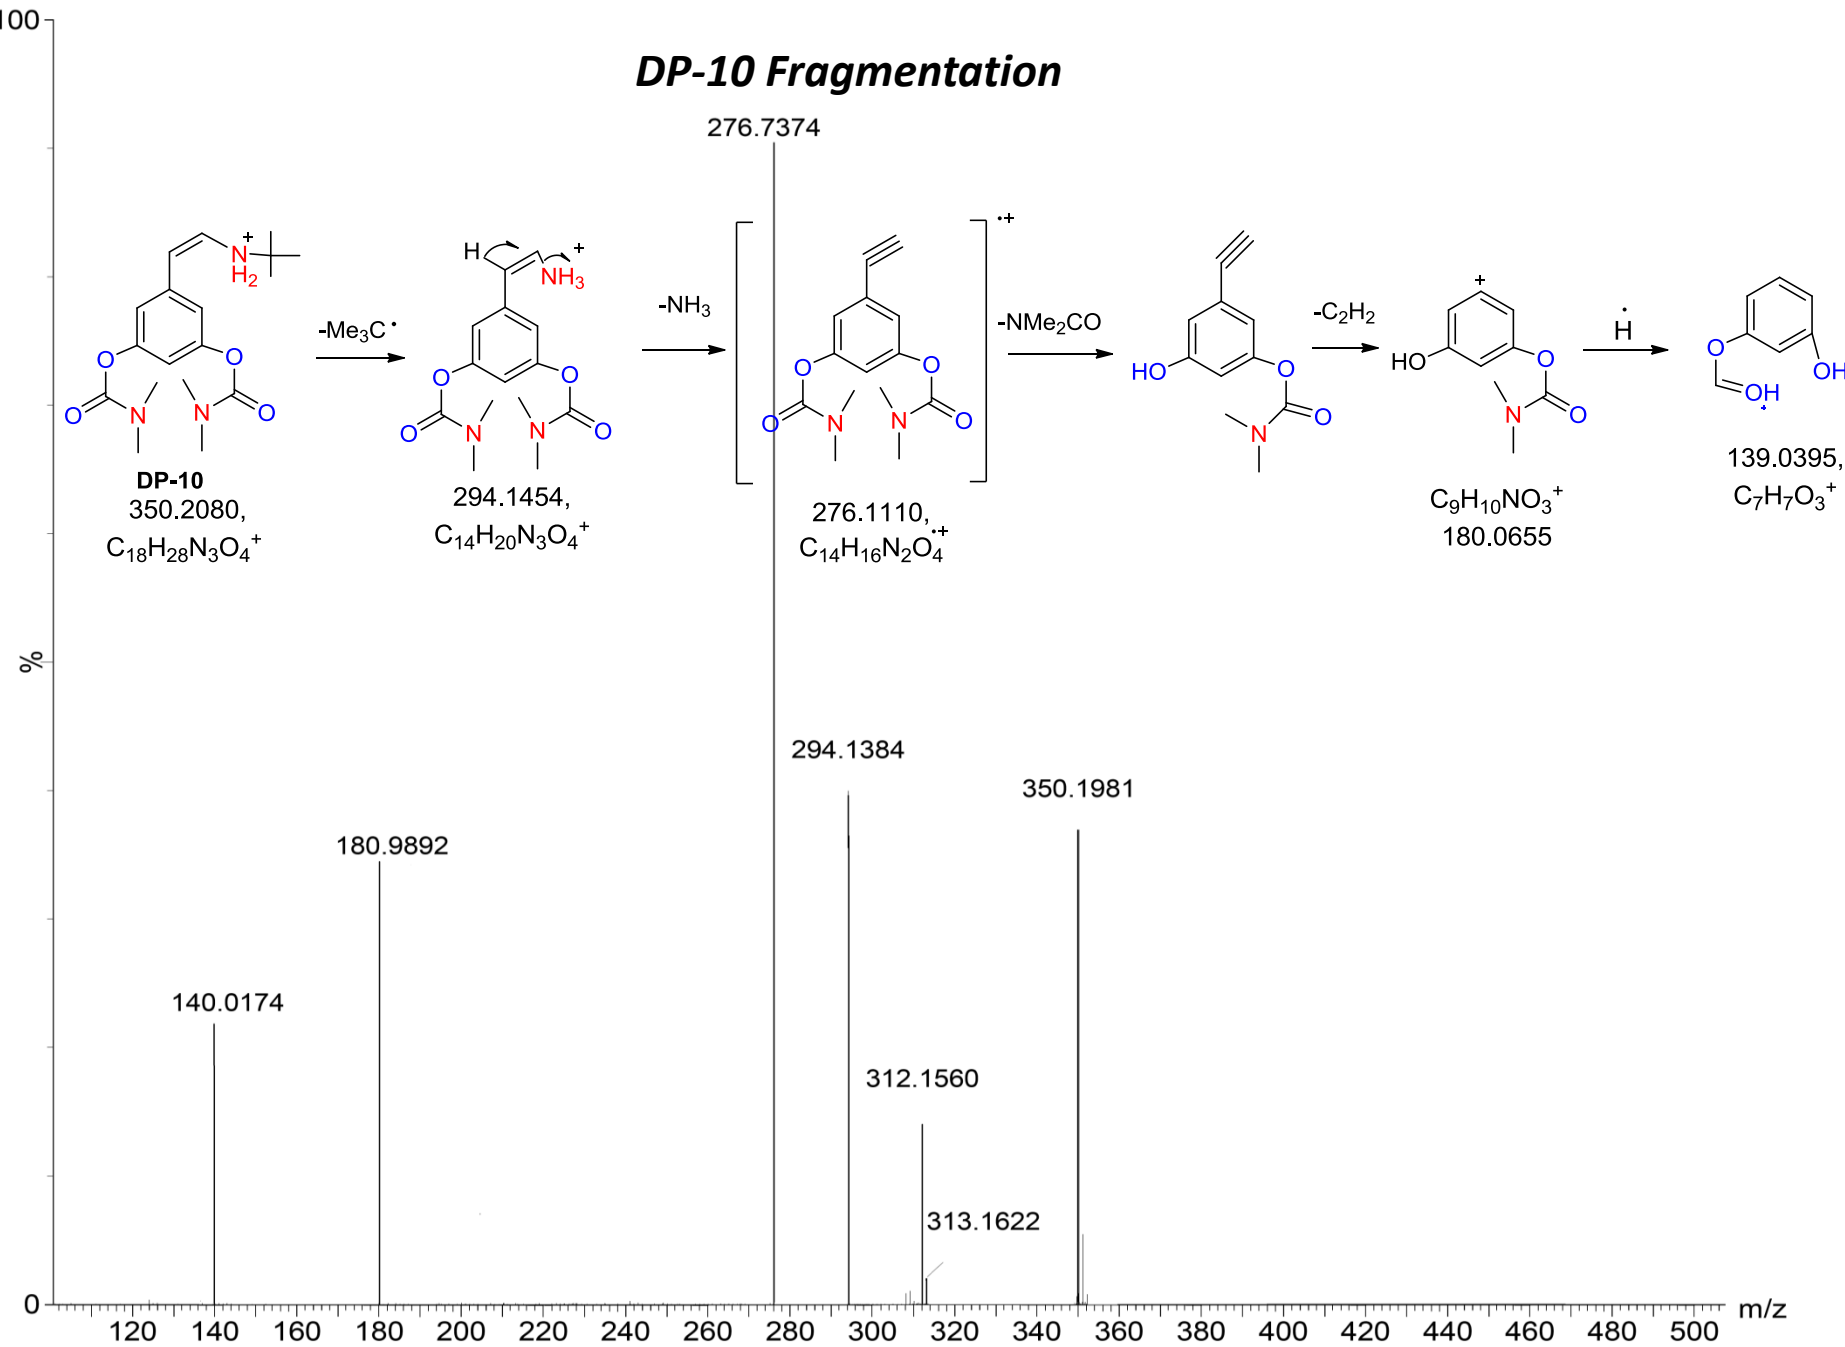

**Figure 27: Fragmentation pattern and LCMS spectra of DP-10**

# DP-11 Fragmentation

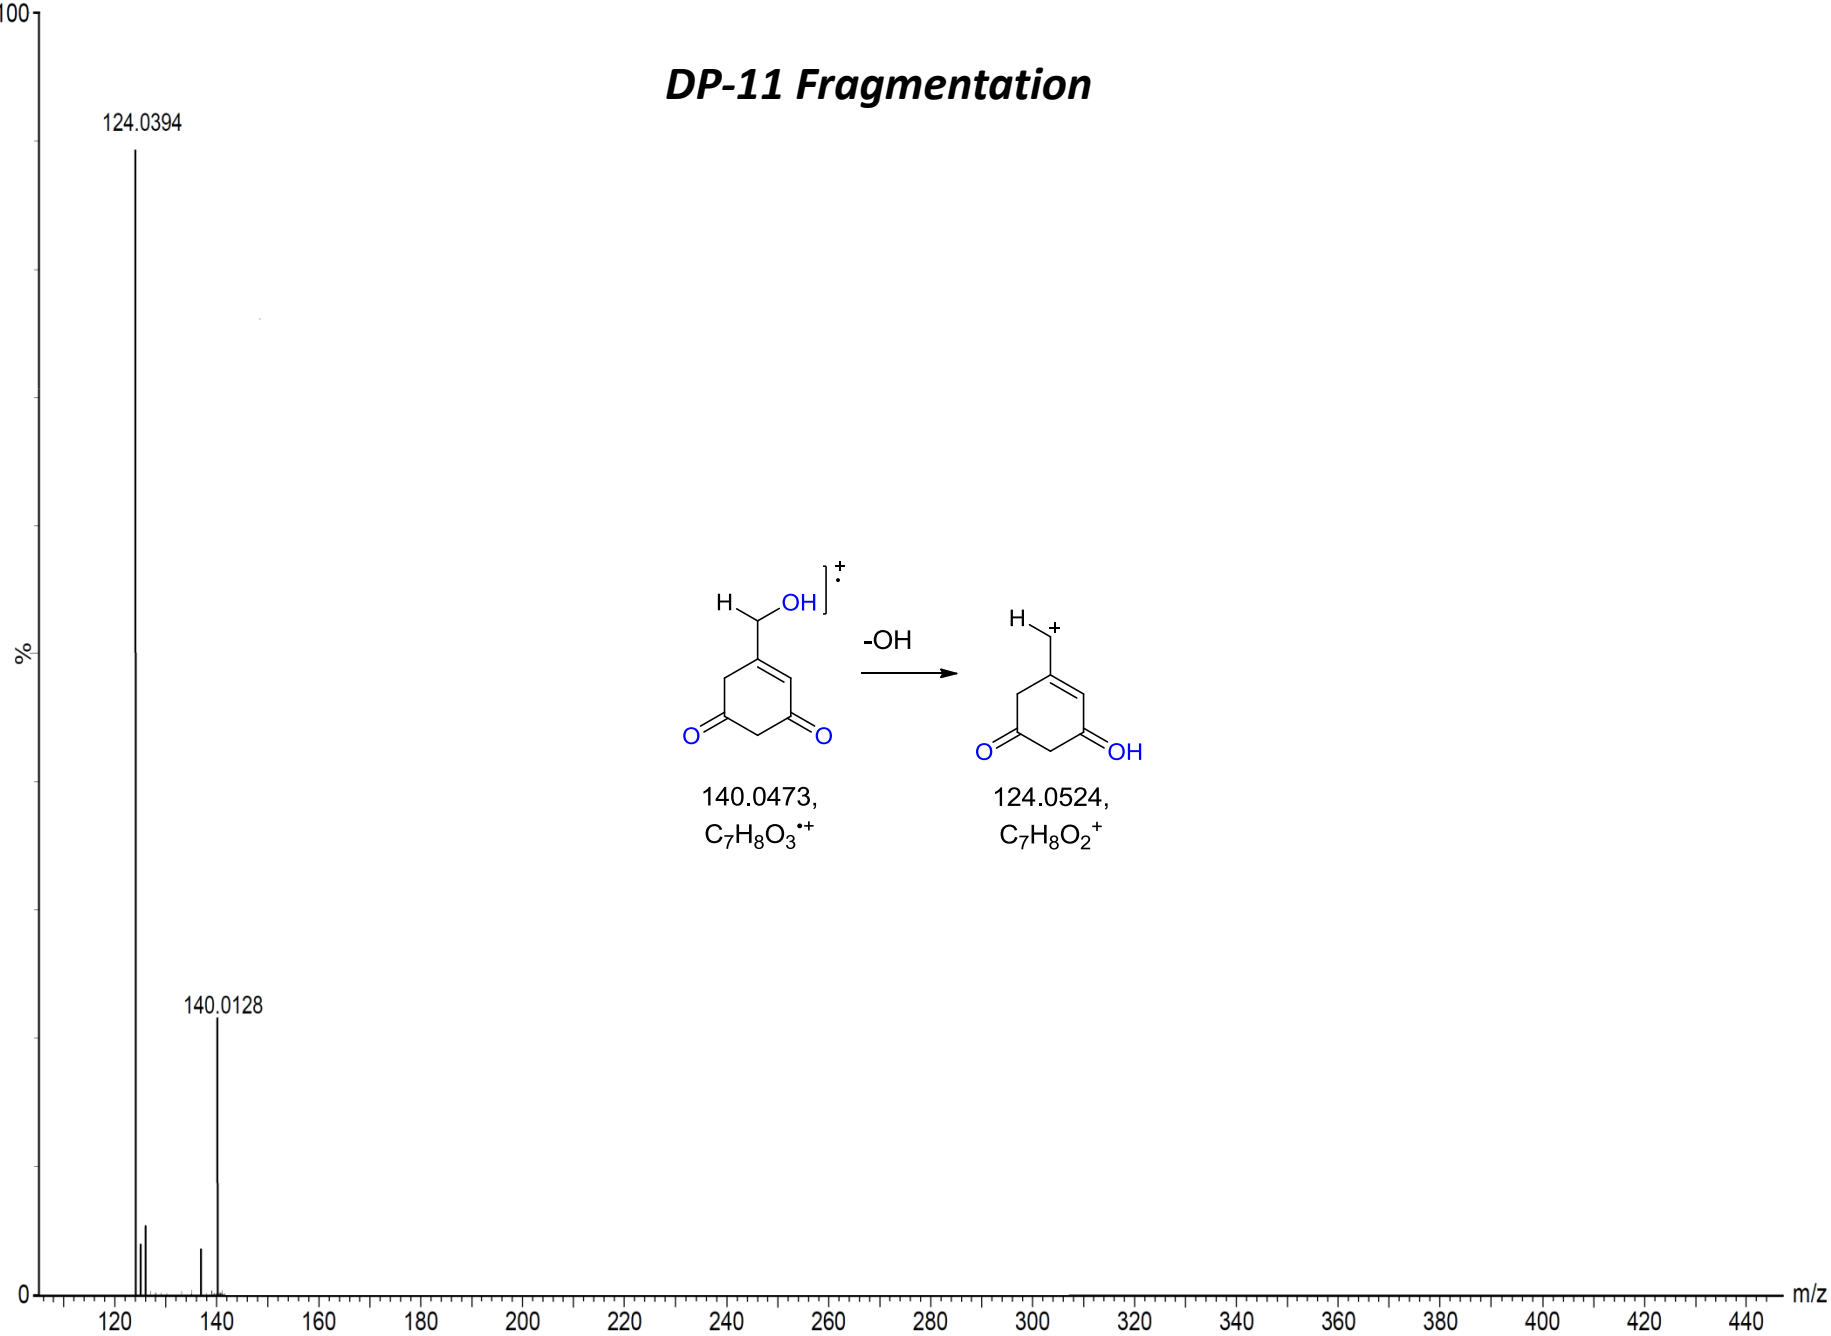

**Sfigure28 : Fragmentation pattern and LCMS spectra of DP-11**

## DP-12 Fragmentation

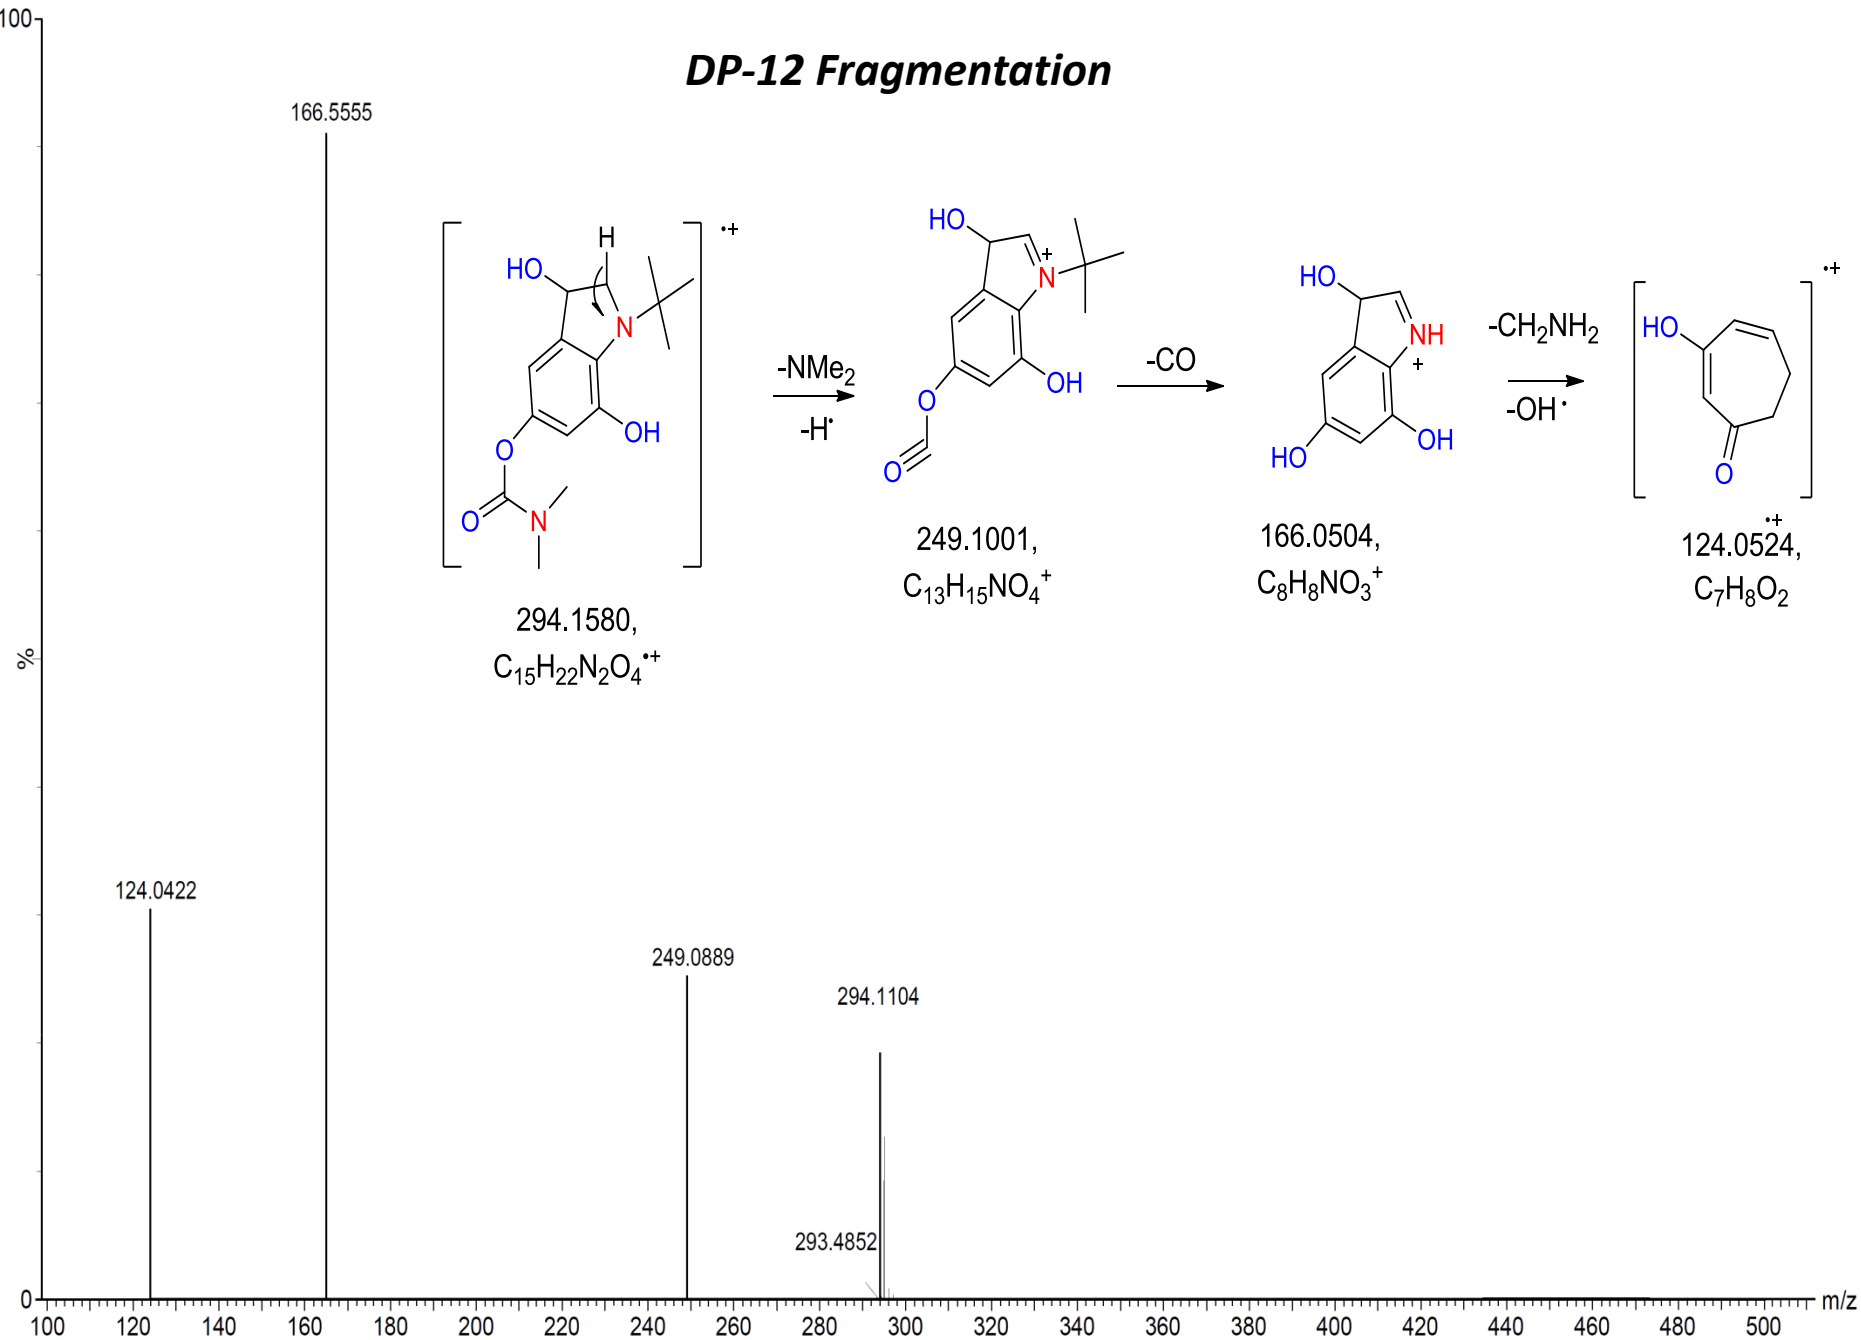

**Figure 29: Fragmentation pattern and LCMS spectra of DP-12**
